# Supplementary material
Source: ML conference proceedings conference paper supplement (https://openreview.net/forum?id=usOkGv1S7M)
Supplement: supplementary_material [file Full_Paper_with_Appendix.pdf › Full_Paper_with_Appendix.pdf]

---

# UFT: Unifying Supervised and Reinforcement Fine-Tuning

---

Anonymous Author(s)

Affiliation

Address

email

## Abstract

1 Post-training has demonstrated its importance in enhancing the reasoning capabilities of large language models (LLMs). The primary post-training methods can be  
2 categorized into supervised fine-tuning (SFT) and reinforcement fine-tuning (RFT).  
3 SFT is efficient and well-suited for small language models, but it may lead to over-  
4 fitting and limit the reasoning abilities of larger models. In contrast, RFT generally  
5 yields better generalization but depends heavily on the strength of the base model.  
6 To address the limitations of SFT and RFT, we propose Unified Fine-Tuning (UFT),  
7 a novel post-training paradigm that unifies SFT and RFT into a single, integrated  
8 process. UFT enables the model to effectively explore solutions while incorpor-  
9 ating informative supervision signals, bridging the gap between memorizing and  
10 thinking underlying existing methods. Notably, UFT outperforms both SFT and  
11 RFT in general, regardless of model sizes. Furthermore, we theoretically prove that  
12 UFT breaks RFT’s inherent exponential sample complexity bottleneck, showing  
13 for the first time that unified training can exponentially accelerate convergence on  
14 long-horizon reasoning tasks.  
15

## 16 1 Introduction

17 When humans learn a new subject, we typically practice with problem sets (thinking) and try to  
18 understand the solutions when we encounter difficulties (memorizing). There are also counterparts in  
19 fine-tuning LLMs, which is

- 20 • **Supervised Fine-Tuning (SFT).** Memorizing the collected reasoning trace (solution) by maxi-  
21 mizing the log-likelihood of it.
- 22 • **Reinforcement Fine-Tuning (RFT).** Exploring the reasoning space of LLM and improving the  
23 performance according to the signal from a verifier of the *final answer* (thinking).

24 However, unlike humans, learning and thinking are disentangled during the training of language  
25 models. Specifically, prior work [DeepSeek-AI et al., 2025, Zhou et al., 2023, Muennighoff et al.,  
26 2025, Liu et al., 2025, Zeng et al., 2025] typically applies either SFT or RFT throughout the fine-  
27 tuning phase, or applies RFT only after SFT completes (cf. Figure 1). The choice of the proper  
28 fine-tuning algorithm depends on the LLM’s capacity and the task’s complexity. Specifically, when  
29 the LLM is weak, SFT typically works better since the LLM cannot explore the correct answer during  
30 reinforcement learning [Pan et al., 2025], due to the sparse reward caused by the verifier-based reward  
31 model. On the other hand, when the LLM is strong, RFT generalizes better [Xie et al., 2025, Chu  
32 et al., 2025].

33 To get the best of both worlds, we propose Unified Fine-Tuning (UFT), which unifies SFT and  
34 RFT and enriches the reinforcement learning signal with supervised feedback, enabling the model  
35 to acquire new knowledge during fine-tuning more efficiently. In Figure 1, SFT-RFT refers to the

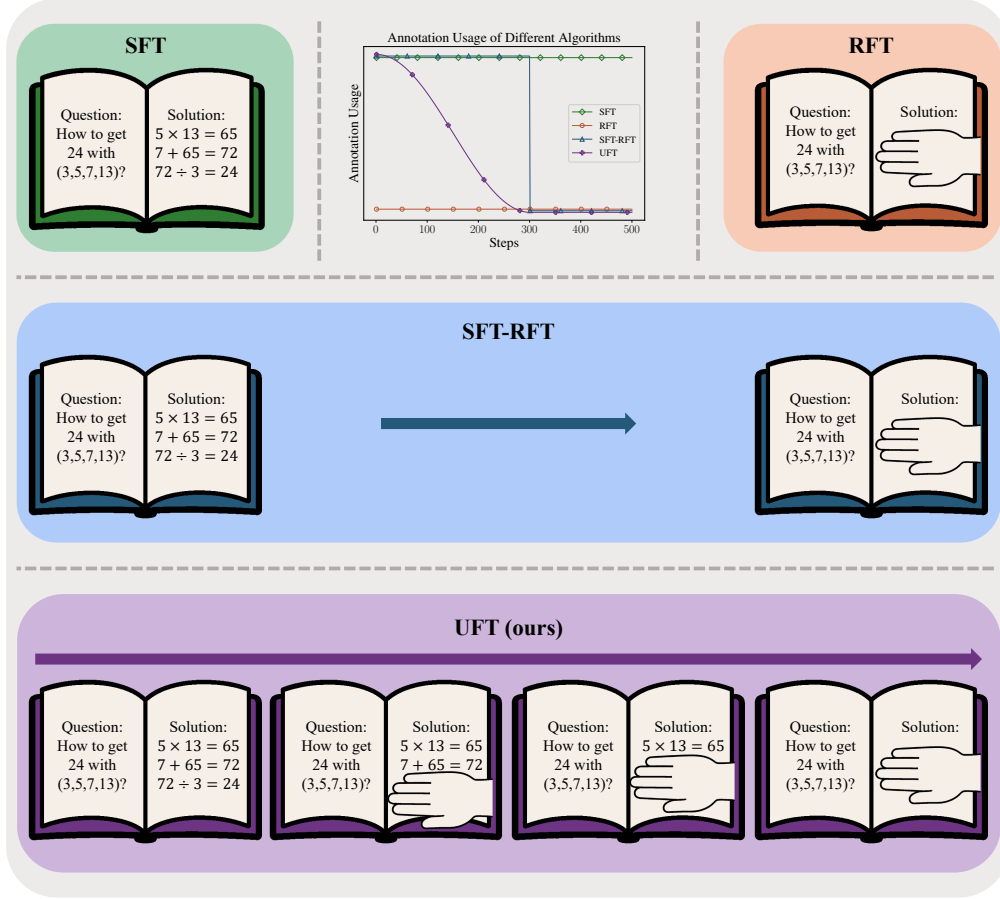

Figure 1: (top left, top right, middle, bottom). The illustration of SFT, RFT, SFT-RFT, and UFT, respectively. SFT-RFT refers to applying RFT after an initial SFT stage [DeepSeek-AI et al., 2025, Zeng et al., 2025]. (Top, center). shows the annotation usage of different algorithms over training. Curves are slightly shifted for better visibility.

common practice of initiating reinforcement learning from a supervised fine-tuned model, as widely adopted in the literature [DeepSeek-AI et al., 2025, Zeng et al., 2025]. As shown in Figure 1 (top left), SFT uses full annotations (solutions) throughout training, whereas RFT does not use any annotations at all (Figure 1, top right). Similarly, SFT-RFT begins with SFT using full annotations, but once the RFT phase starts, it discards all annotations and relies entirely on exploration. In contrast, our method, UFT, offers a smooth transition from SFT to RFT, preserving the annotation signal early on and gradually reducing it as the model becomes capable of self-guided reasoning.

The most relevant work to UFT is Learning Reasoning through Reverse Curriculum Reinforcement Learning ( $R^3$ ) [Xi et al., 2024], which proposes a curriculum learning method that concatenates the problem with a slice of the solution (hint, cf. Figure 4 left). While  $R^3$  treats hints primarily as exploration aids, UFT further integrates them as part of the supervision signal. This unification enables reinforcement learning not just to search, but to learn from existing solutions, effectively raising the performance ceiling imposed by the model’s pretraining capacity (cf. Figure 2). A detailed comparison with related work is postponed to Appendix A.

Figure 2 shows the accuracy of different algorithms over time, while the training set is Countdown [Wikipedia contributors, 2025, Pan et al., 2025], MATH(3,4,5) (levels 3–5 only) [Hendrycks et al., 2021, Zeng et al., 2025], and the Knights and Knaves logic puzzle (Logic) [Xie et al., 2025]. Base refers to the model before fine-tuning, and  $R^3$  represents the curriculum reinforcement learning baseline [Xi et al., 2024]. As shown in the figure, UFT generally outperforms all other algorithms. Furthermore, we provide the evaluation on various benchmarks, and the results are shown in Table 2.

Average Accuracy of 'Qwen2.5-0.5/1.5/3B'

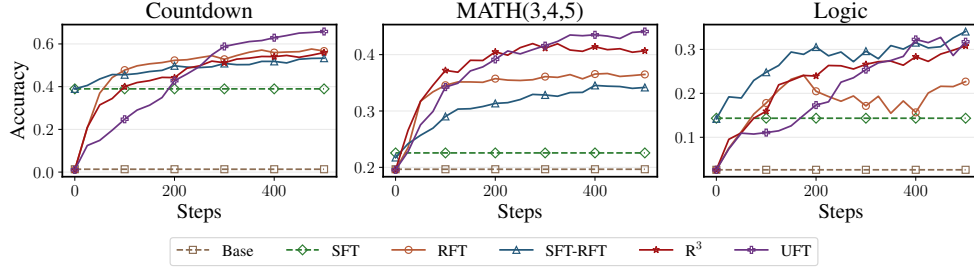

Figure 2: Presentation for different algorithms’ accuracy when trained on Countdown [Wikipedia contributors, 2025], MATH(3,4,5) (level 3-5 only) [Hendrycks et al., 2021, Zeng et al., 2025], and the Knights and Knaves logic puzzle (Logic) [Xie et al., 2025]. Accuracy is averaged over Qwen2.5 models of sizes 0.5B, 1.5B, and 3B [Qwen et al., 2025]. Base refers to the model without fine-tuning, and  $R^3$  is the curriculum reinforcement learning baseline [Xi et al., 2024]. The figure shows that UFT outperforms both SFT and RFT, while the relative performance of SFT and RFT varies depending on task complexity.

Moreover, we theoretically prove that RFT [DeepSeek-AI et al., 2025, Zeng et al., 2025, Liu et al., 2025] suffers from an inherent sample complexity bottleneck, which is exponential in the length of the reasoning. In contrast, the unified training paradigm in UFT can improve the sample complexity to a polynomial dependence on the reasoning length, which is an exponential improvement over RFT.

## 1.1 Contribution

We state the contribution of this paper in the following.

- Integration of Supervision and Reward Signal.** UFT provides a general framework that integrates the supervision from SFT and reward from RFT into a single training paradigm. UFT blends reward optimization with log-likelihood maximization on hints (partial solution), and smoothly transitions from fully supervised to fully reinforcement learning. Such integration allows models to explore and learn simultaneously, addressing the trade-off between memorization (SFT) and generalization (RFT) in a principled way.
- Theoretical Justification.** We provide a theoretical analysis of UFT, proving it achieves polynomial sample complexity dependence on reasoning length, compared to the exponential complexity required by standard RFT. This result formally establishes the efficiency gains from unifying learning (cf. Section 4).
- Empirical Validation Across Model Scales and Tasks.** We evaluate the algorithms by training Qwen2.5-0.5/1.5/3B [Qwen et al., 2025] and Llama3.2-1/3B [Grattafiori et al., 2024] on Countdown [Wikipedia contributors, 2025, Pan et al., 2025], MATH [Hendrycks et al., 2021], and the Knights and Knaves logic puzzle (Logic) [Xie et al., 2025]. UFT consistently outperforms previous methods, showing robustness across domains and models (cf. Section 5).

## 2 Preliminaries

**Notation.** For any integer  $n > 0$ , let  $[n] := \{1, 2, \dots, n\}$  and  $\Delta^n := \{\mathbf{x} \in [0, 1]^n : \sum_{i=1}^n x_i = 1\}$  be the  $n - 1$ -dimensional probability simplex. For any two distribution  $\mathbf{x}, \mathbf{y} \in \Delta^n$ , let  $\text{KL}(\mathbf{x} \parallel \mathbf{y}) := \sum_{i=1}^n x_i \log \frac{x_i}{y_i}$  denote the KL-divergence between  $\mathbf{x}$  and  $\mathbf{y}$ . For any discrete set  $\mathcal{S}$ , let  $|\mathcal{S}|$  be its cardinality.

**Search Tree.** The problem-solving process can be represented as a *search tree*, as illustrated in Figure 3. Except for the leaf nodes, each node (also referred to as a *state*—we use the terms node and state interchangeably) in the search tree has  $B$  children, where  $B$  is the *branching factor*. Each child represents a different next token (or next sentence) to be generated, so a path from the root to a leaf

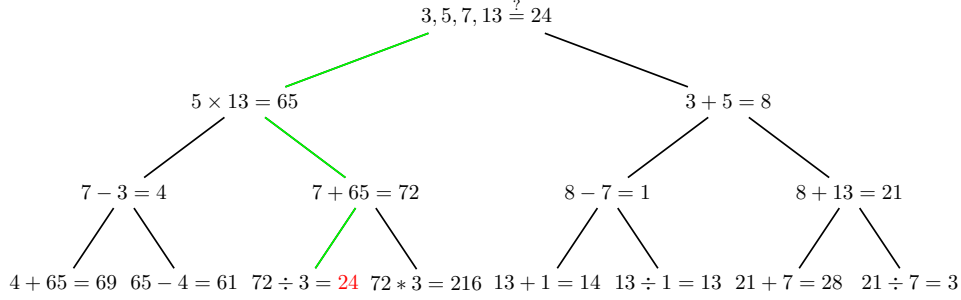

Figure 3: An illustration of the Countdown game, where the goal is to obtain 24 by applying basic arithmetic operations (+, −, ×, ÷) to the numbers (3, 5, 7, 13). The green path represents the correct solution.

node corresponds to a complete solution to the problem. The tree has a height of  $H$ , with the root at height 0, and each node’s height equal to its parent’s height plus one.

Let  $\mathcal{S}_h$  denote the set of nodes with height  $h \in \{0, 1, \dots, H\}$  and  $\mathcal{S} := \bigcup_{h=0}^H \mathcal{S}_h$ . Note that  $|\mathcal{S}_0| = 1$  since it only contains the root  $s_{\text{root}}$ , and  $|\mathcal{S}_{h+1}| = B \cdot |\mathcal{S}_h|$ . Therefore, there are  $\sum_{h=0}^H B^h = \frac{B^{H+1}-1}{B-1}$  nodes in total. Once reaching a leaf node  $s \in \mathcal{S}_H$ , the model will receive reward  $\mathcal{R}(s) \in [0, 1]$ . A policy can be written as  $\pi: \bigcup_{h=0}^{H-1} \mathcal{S}_h \rightarrow \Delta^B$ , where  $\pi(a | s)$  is the probability of selecting the  $a^{\text{th}}$  child of  $s$ . For any state-action pairs  $(s, a) \in \mathcal{S} \times [B]$ , let  $\mathcal{T}(s, a) \in \mathcal{S}$  be the child at the branch  $a$  of state  $s$ , and  $\mathcal{T}(s, a) = \emptyset$  for  $s \in \mathcal{S}_H$ . The value function of policy  $\pi$  is written as  $V^\pi: \mathcal{S} \rightarrow [0, 1]$ . We write  $s_{h_0} = s, (s_h)_{h=h_0}^H \sim \pi$  as the trajectory starting from  $s$  and sampled according to  $\pi$ , i.e.,  $a_h \sim \pi(\cdot | s_h), s_{h+1} = \mathcal{T}(s_h, a_h)$ . For any  $h_0 \in \{0, 1, \dots, H\}$  and  $s \in \mathcal{S}_{h_0}$ , we define  $V^\pi(s) := \mathbb{E}_{s_{h_0}=s, (s_h)_{h=h_0}^H \sim \pi} [\mathcal{R}(s_H)]$ , which is the expected reward obtained by following policy  $\pi$  starting from node  $s$ .

Let  $\pi^* \in \arg\max_{\pi} V^\pi(s_{\text{root}})$  denote the optimal (deterministic) policy that achieves the highest expected reward<sup>1</sup>. Let  $V^* := V^{\pi^*}(s_{\text{root}})$  be the expected reward of the optimal policy  $\pi^*$ . Since  $\pi^*$  is deterministic, let  $(s_0^*, a_0^*, s_1^*, a_1^*, \dots, s_H^*)$  represent the path from the root to a leaf node by following  $\pi^*$ , where  $s_0^* = s_{\text{root}}$ .

### 3 Unified Fine-Tuning (UFT)

In this section, we introduce the two key features of UFT: (i) an exploration mechanism guided by hint, which improves sample efficiency by mitigating the sparse reward problem common in rule-based reinforcement learning [DeepSeek-AI et al., 2025]; and (ii) a hybrid training objective that combines reinforcement learning with a log-likelihood term on hints, which provides a more informative learning signal and enables the model to acquire knowledge more effectively during fine-tuning.

#### 3.1 Exploration with Hint

Although RFT is beneficial for training large models [DeepSeek-AI et al., 2025], several recent studies [Pan et al., 2025] report that small models often fail to reason effectively, as they may never explore the correct answer even once due to the sparse reward. Additionally, other work has found that RFT’s final performance is constrained by base models’ capabilities [Gandhi et al., 2025].

To address the sparse reward issue, UFT guides exploration using a hint, that is, trajectory sampling starts from the concatenation of the problem description and a hint, which is a partial solution to the problem (cf. Figure 4). In this way, models will explore the correct answer more frequently.

RFT can be modeled as the task of finding a path from the root of the problem-solving tree to a leaf node that represents the correct answer. As shown in Figure 3, RFT needs to identify the green

<sup>1</sup>There exists at least one deterministic optimal policy, and we choose such a policy as  $\pi^*$ .

119 path. However, the problem-solving tree for real-world tasks, such as math problems, typically  
 120 contains an enormous number of nodes, making it difficult for an LLM to discover the correct path  
 121 through exploration alone. To make matters worse, under the rule-based reward model proposed in  
 122 DeepSeek-AI et al. [2025], only a small fraction of the leaf nodes correspond to correct answers,  
 123 resulting in the well-known sparse reward problem [Ladosz et al., 2022].

124 We address this challenge by concatenating the problem with a partial solution, referred to as the *hint*,  
 125 to guide the model towards the correct answer. Figure 4 (left) provides an example of UFT’s prompt.

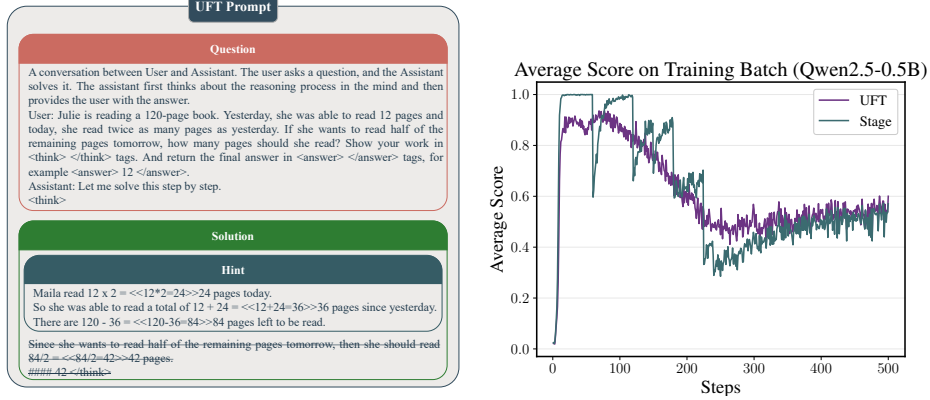

Figure 4: (left). An illustration of the UFT prompt. We adopt the prompting template from TinyZero [Pan et al., 2025], which is similar to that used in Deepseek-R1 [DeepSeek-AI et al., 2025]. The hint consists of a slice of the full solution. During training, the question prompt and the hint are concatenated and fed to the model. (right). An illustration of the training curve of Qwen2.5-0.5B. Stage and UFT keep zero hint since step 300.

### 126 3.1.1 Hint Length Sampling

127 Since we are ultimately interested in the LLM’s performance when the hint length is zero, the hint  
 128 must be gradually shortened during training. A natural idea is to subtract the hint length by a constant  
 129 amount regularly, which is referred to as the staged reinforcement learning [Xi et al., 2024]. However,  
 130 because solutions typically consist of no more than 10 sentences, changes in hint length can cause a  
 131 significant distribution shift, leading to unstable training (cf. Figure 4, right).

132 To avoid distribution shift during training, Xi et al. [2024] samples the hint length uniformly from all  
 133 possible values throughout the training. However, relying on hints throughout training introduces a  
 134 significant distribution mismatch between training and evaluation. This often leads to performance  
 135 collapse at test time, where no hints are available. To address this, UFT employs a smoothed reduction  
 136 of hint length to zero, which (i) avoids drastic distribution shifts and (ii) better aligns the training  
 137 distribution with the evaluation distribution.

138 Specifically, we maintain a variable  $p \in [0, 1]$ , representing the proportion of the solution revealed to  
 139 the LLM as a hint. The value of  $p$  gradually descends during training according to cosine annealing  
 140 (cf. (B.1)) [Loshchilov and Hutter, 2017]. Let  $l$  be the random variable indicating the hint length,  
 141 and let  $L$  be the total length of the solution (e.g., number of sentences). By definition, we require  
 142  $l \in \{0, 1, \dots, L\}$  and  $\mathbb{E}[l] = p \cdot L$ , so that the expected hint length matches the proportion  $p$ . To  
 143 achieve this, we sample  $l \sim \text{Binomial}(L, p)$  from a Binomial distribution<sup>2</sup>. It is straightforward to  
 144 verify that  $\mathbb{E}[l] = L \cdot \mathbb{E}[c_1] = p \cdot L$ .

145 Compared to stage-wise hint length reduction, UFT provides a smoother transition from long to short  
 146 hints. The training curves of these algorithms are shown in Figure 4 (right). We can see that the  
 147 training curve of UFT is smoother and converges faster than that of the staged reinforcement learning.  
 148 Note that staged reinforcement learning and UFT do not use any hint since step 300.

<sup>2</sup> $\Pr(l = l_0) = \binom{L}{l_0} p^{l_0} (1 - p)^{L-l_0}$  for any  $l_0 \in \{0, 1, \dots, L\}$ . In other words,  $l$  is the number of heads obtained when tossing  $L$  independent coins, each landing heads with probability  $p$ .

As shown in Figure 5, although RFT (cosine), which is RFT equipped with the cosine annealing hint length scheduler, outperforms  $R^3$  (uniform sampling), it is still worse than SFT-RFT. Furthermore, for Llama-3.2-1B, RFT (cosine) is even worse than SFT alone. This implies that the model’s performance is hindered by its knowledge gained through pretraining [Gandhi et al., 2025], which motivates the second modification of UFT introduced in Section 3.2, an additional log-likelihood term in the objective function.

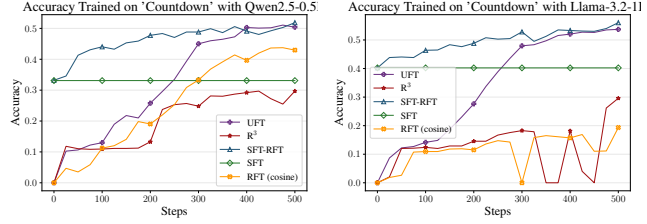

Figure 5: An ablation study of different hint length schedulers. RFT (cosine) refers to reinforcement learning with our cosine annealing hint length scheduler proposed in this section.

### 3.2 Objective Function Modification

The hinted RFT only enables LLMs to explore the correct solution more frequently, but remains inefficient at injecting new knowledge into the LLMs. This inefficiency arises because each sampled trajectory provides limited information, essentially a signal (correct/incorrect), which provides far less information than the supervision signal in SFT. In contrast, SFT enables more efficient knowledge acquisition, but suffers from poor generalization [Xie et al., 2025, Zeng et al., 2025]. To get the best of both worlds, UFT introduces an additional log-likelihood term to the objective function of RFT, allowing the model to learn from the informative supervision signal and still benefit from the generalization of RFT.

For notational simplicity, let  $s_0 = s_{\text{root}}, (s_h, a_h)_{h=0}^{H-1} \sim \pi$  denote the shorthand for  $a_h \sim \pi(\cdot | s_h)$  and  $s_{h+1} = \mathcal{T}(s_h, a_h)$ , *i.e.*,  $(s_h, a_h)_{h=0}^{H-1}$  represents a trajectory sampled according to  $\pi$  starting at  $s_{\text{root}}$ . Formally, let  $\mathcal{J}^{\text{value}}((s_h, a_h)_{h=0}^{H-1})$  denote the objective function associated with the expected reward<sup>3</sup>. Then, let  $\beta > 0$  be the hyperparameter controlling the KL divergence, we have

$$\mathcal{J}^{\text{RFT}} = \mathbb{E}_{s_0=s_{\text{root}}, (s_h, a_h)_{h=0}^{H-1} \sim \pi} \left[ \mathcal{J}^{\text{value}}((s_h, a_h)_{h=0}^{H-1}) - \beta \sum_{h=0}^{H-1} \text{KL}(\pi(\cdot | s_h) \| \pi^{\text{ref}}(\cdot | s_h)) \right] \quad (3.1)$$

$$\mathcal{J}^{\text{UFT}} = \mathbb{E}_{\substack{l, s_0=s_{\text{root}} \\ (s_h, a_h)_{h=0}^{l-1} \sim \pi^*, \\ (s_h, a_h)_{h=l}^{H-1} \sim \pi}} \left[ \mathcal{J}^{\text{value}}((s_h, a_h)_{h=l}^{H-1}) - \beta \sum_{h=l}^{H-1} \text{KL}(\pi(\cdot | s_h) \| \pi^{\text{ref}}(\cdot | s_h)) - \beta \sum_{h=0}^{l-1} \text{KL}(\pi^*(\cdot | s_h) \| \pi(\cdot | s_h)) \right] \quad (3.2)$$

Compared to the objective function of GRPO, UFT adds an additional term  $\beta \sum_{h=0}^{l-1} \text{KL}(\pi^*(\cdot | s_h) \| \pi(\cdot | s_h))$ , the KL divergence between the optimal policy and the current policy. Compared to  $\mathcal{J}^{\text{value}}$ , this term explicitly guides the policy towards optimality, and thus results in a faster convergence rate.

We remark that the optimal policy  $\pi^*$  is unknown and we cannot compute  $\beta \sum_{h=0}^{l-1} \text{KL}(\pi^*(\cdot | s_h) \| \pi(\cdot | s_h))$  directly. However, thanks to the annotations contained in the dataset, we have access to a trajectory sampled according to  $\pi^*$ , *i.e.*,  $(s_h^*, a_h^*)_{h=0}^{H-1} \sim \pi^*$ , which can be used to estimate the KL-divergence. According to the definition of KL-divergence, minimizing  $\text{KL}(\pi^*(\cdot | s_h^*) \| \pi(\cdot | s_h^*))$  is equivalent to minimizing  $\sum_{a_h=1}^B \pi^*(a_h | s_h^*) \log \frac{1}{\pi(a_h | s_h^*)}$  (omit terms irrelevant to  $\pi$ ), and  $\log \frac{1}{\pi(a_h^* | s_h^*)}$  is an unbiased estimator of it, since  $a_h^* \sim \pi^*(\cdot | s_h^*)$ . Therefore, (3.2) can be equivalently written as

$$\mathcal{J}^{\text{UFT}} = \mathbb{E}_{\substack{l, s_l=s_h^*, \\ (s_h, a_h)_{h=l}^{H-1} \sim \pi}} \left[ \mathcal{J}^{\text{value}}((s_h, a_h)_{h=l}^{H-1}) - \beta \sum_{h=l}^{H-1} \text{KL}(\pi(\cdot | s_h) \| \pi^{\text{ref}}(\cdot | s_h)) + \beta \sum_{h=0}^{l-1} \log \pi(a_h^* | s_h^*) \right]. \quad (3.3)$$

<sup>3</sup>In GRPO [Shao et al., 2024], we have  $\mathcal{J}^{\text{value}}((s_h, a_h)_{h=0}^{H-1}) := \frac{1}{H} \sum_{h'=0}^{H-1} \min \left\{ \frac{\pi(a_{h'} | s_{h'})}{\pi^{\text{old}}(a_{h'} | s_{h'})} \hat{A}_{h'}, \text{clip} \left( \frac{\pi(a_{h'} | s_{h'})}{\pi^{\text{old}}(a_{h'} | s_{h'})}, 1 - \epsilon, 1 + \epsilon \right) \hat{A}_{h'} \right\}$ , where  $\pi$  is the current policy,  $\pi^{\text{old}}$  is the policy at the previous step,  $\hat{A}_{h'}$  is the estimated advantage value in GRPO.

Therefore, the UFT objective (3.3) can be interpreted as (i) maximizing the expected reward while (ii) staying close to the reference policy and (iii) memorizing the hint by maximizing the log-likelihood of producing the hint.

**Remark 3.1.** The name of Unified Fine-Tuning (UFT) comes from the fact that when  $p \equiv 0$  for all steps during training, (3.3) is equivalent to RFT, since  $\beta \sum_{h=0}^{l-1} \log \pi(a_h^* | s_h^*) = 0$ . When  $p \equiv 1$ , then  $\mathcal{J}^{\text{value}}((s_h, a_h)_{h=l}^{H-1}) - \beta \sum_{h=l}^{H-1} \text{KL}(\pi(\cdot | s_h) \| \pi^{\text{ref}}(\cdot | s_h)) = 0$ , so that (3.3) degenerates to SFT. An illustration can be found in Figure 1 (top middle).

It is noteworthy that after adopting the additional log-likelihood term, UFT’s performance matches that of SFT-RFT for small models (cf. Figure 5). This suggests that UFT improves the ceiling of RFT by enabling the model to acquire new knowledge during post-training.

## 4 Theoretical Justification

In this section, we provide a theoretical justification for UFT. First, we show that the lower bound of RFT’s sample complexity grows exponentially ( $\mathcal{O}(B^H)$ ) as the tree height (reasoning length) increases. Second, we show that UFT may find the solution within a polynomial number of samples ( $\mathcal{O}(BH^5 \log B)$ ), representing an *exponential* improvement of tree height  $H$  in sample complexity.

Next, we define the sub-optimality gap in reward, which is the difference between the rewards for correct and incorrect solutions.

**Definition 4.1** (Sub-Optimality Gap). There is a *sub-optimality gap*  $\Delta > 0$  between the reward of optimal and suboptimal nodes. Formally, for any leaf node  $s \in \mathcal{S}_H$  with reward  $\mathcal{R}(s) < \max_{s' \in \mathcal{S}_H} \mathcal{R}(s')$ , we have

$$\mathcal{R}(s) \leq \max_{s' \in \mathcal{S}_H} \mathcal{R}(s') - \Delta. \quad (4.1)$$

In this paper, there are only three possible outcomes for  $\mathcal{R}(s)$ , *i.e.*, no reward (incorrect format), format reward, and accuracy reward. Therefore, the sub-optimality gap

$$\Delta = (\text{accuracy reward}) - (\text{format reward}) = 1.0 - 0.1 = 0.9. \quad (4.2)$$

Next, we will give the lower bound on the RFT’s sample complexity to achieve 50% pass@1 success rate<sup>4</sup>.

**Theorem 4.2** (Lowerbound). For any integers  $H \geq 1, B \geq 2$ , and any RFT algorithm, there exists a problem with height  $H$  and branching factor  $B$ , that satisfies the following: to achieve a 50% pass@1 success rate, the algorithm needs to explore at least

$$\frac{B^H}{4} \quad (4.3)$$

nodes in  $\mathcal{S}_H$ . Moreover, when there are multiple nodes in  $\mathcal{S}_H$  representing the correct solutions, *e.g.*,  $K \geq 1$ , any algorithm needs to explore at least  $\frac{B^H}{4K}$  nodes in  $\mathcal{S}_H$ .

The proof constructs a set of problems with different correct solutions, which cannot be distinguished before exploring sufficient nodes in  $\mathcal{S}_H$ . The details can be found in Appendix C. Furthermore, the traditional lower bounds in reinforcement learning [Jin et al., 2018, Domingues et al., 2021] are built on the stochastic transitions of the Markov decision process, but the search tree’s transition is deterministic, which requires a different construction.

Theorem 4.2 implies that when the reward is sparse, such as when  $K$  is a constant, learning the optimal policy takes a number of iterations exponential in the height of the tree. This also justifies why long reasoning is generally difficult [Chai et al., 2025, Chen et al., 2025]. In the following, we will show that UFT *exponentially* improves the sample complexity. The full algorithm can be found in Algorithm 2.

**Theorem 4.3** (Informal). When  $\beta$  is small enough, Algorithm 2 obtains a 50% pass@1 success rate when the algorithm explores

$$\mathcal{O}\left(B \frac{H^5 (\log B)^2}{\Delta^2}\right) \quad (4.4)$$

nodes in  $\mathcal{S}_H$ .

<sup>4</sup>The probability of reaching the correct answer when sampling a single trajectory.



Accuracy Trained with 'Qwen2.5-0.5B'

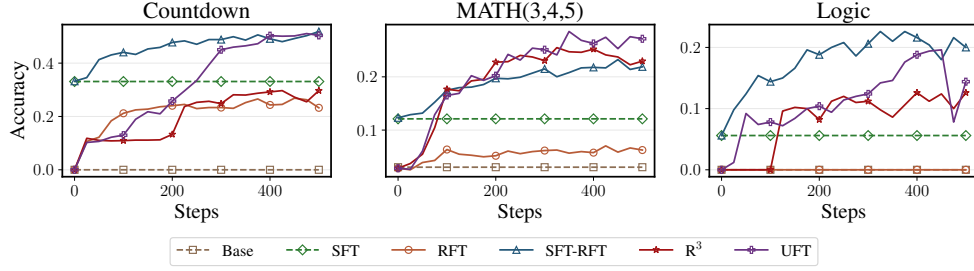

Figure 6: An illustration of the accuracy on the test dataset of Qwen2.5-0.5B. Base is the base model without fine-tuning.  $R^3$  [Xi et al., 2024] trained the model with RFT and a uniform distribution over all hint lengths. SFT-RFT refers to training a supervised fine-tuned model with RFT, and UFT is our algorithm.

The formal version is deferred to Appendix E. Note that the 50% pass@1 in both Theorem 4.2 and Theorem 4.3 can be arbitrarily adjusted, and it only affects the sample complexity by a constant factor. From Theorem 4.3, we observe that the dependence on  $H$  is reduced from  $B^H$  to  $H^5$ , representing an exponential improvement enabled by the use of hints. Moreover,  $\Delta^2$  in the denominator implies that the difference between accuracy reward and format reward should be large for fast convergence, which is also supported by empirical studies [Shao et al., 2024, Pan et al., 2025, Zeng et al., 2025].

## 5 Experiments

In this section, we present the experimental results of UFT. We demonstrate several key properties of UFT: (i) When the model is small ( $\leq 1B$ ) and SFT outperforms RFT, UFT’s performance matches that of SFT. (ii) When the model is large ( $\sim 3B$ ) and RFT outperforms SFT due to better generalization, UFT’s performance matches that of RFT (and sometimes even outperforms it, cf. Table 2).

In experiments, we train Qwen2.5-0.5B, Qwen2.5-1.5B, Qwen2.5-3B [Qwen et al., 2025], Llama-3.2-1B, and Llama-3.2-3B [Grattafiori et al., 2024] on Countdown [Wikipedia contributors, 2025, Pan et al., 2025], MATH(3,4,5) (only level 3-5 included) [Hendrycks et al., 2021, Zeng et al., 2025], and the Knights and Knaves logic puzzle (Logic) [Xie et al., 2025].

### 5.1 The Memorization of UFT

As shown in Figure 6, we can see that when the model is small, the improvement from RFT is marginal, since the model rarely explores the correct answer. As shown in Figure 7, when training Qwen2.5-0.5B on Logic, RFT rarely explores the correct answer, while UFT finds it at every single timestep.

Compared to  $R^3$ , where hints are also applied, UFT outperforms it since UFT (i) gradually shifts the distribution toward a hint length of zero, and (ii) maximizes the log-likelihood on hints to encode information about the solution in gradients. The proximity between the performance of UFT and SFT-RFT also supports the conclusion that UFT helps the model to memorize the solution when the model’s initial capacity is not enough to solve it.

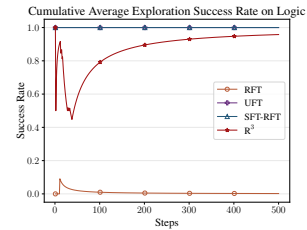

Figure 7: Qwen2.5-0.5B’s cumulative average success rate for exploring the correct answer at each step when trained on Logic.

### 5.2 The Generalization of UFT

As shown in Figure 8, when the model is larger and its prior knowledge gained from pertaining is enough for reasoning, UFT generalizes well as RFT. In contrast, SFT and SFT-RFT are worse, since SFT leads to overfitting. These experiments show that UFT will automatically adapt to model size and enjoy the advantage of both SFT and RFT.



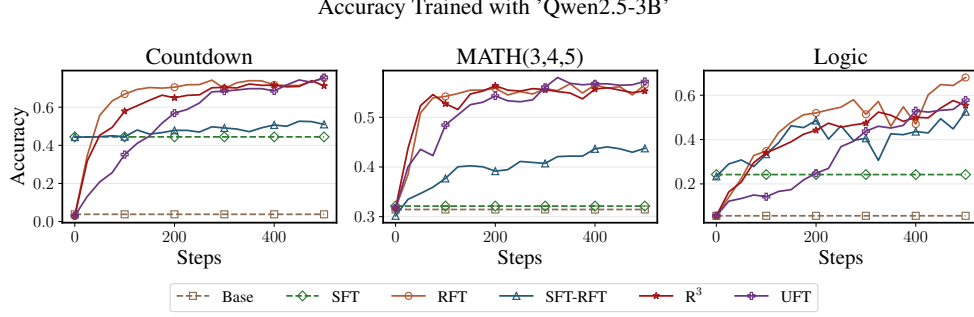

Figure 8: An illustration of the accuracy on test dataset of Qwen2.5-3B. Base refers to the base model without fine-tuning.

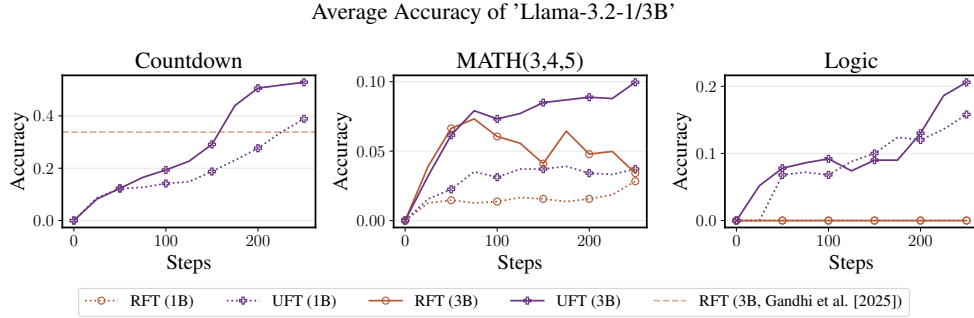

Figure 9: The comparison of Llama-3.2-1B/3B’s behavior in Countdown/MATH/Logic when applying RFT/UFT. In Countdown, the dotted line is the accuracy of Llama-3.2-3B after 250 steps RFT reported in Gandhi et al. [2025] .

As shown in Figure 8, when the model is larger and its prior knowledge gained from pretraining is sufficient for reasoning, UFT generalizes well as RFT. In contrast, SFT and SFT-RFT perform worse, since SFT leads to overfitting. These experiments show that UFT automatically adapts to model size and benefits from the advantages of both SFT and RFT.

### 5.3 UFT Helps LLMs Learn New Knowledge

In Gandhi et al. [2025], it was found that Llama-3.2-3B’s improvement through RFT is marginal compared to that of Qwen2.5-3B. This is because Llama gains less reasoning-related knowledge from pertaining, *e.g.*, backtracking and subgoal setting. In Figure 9, we can see that UFT significantly improves the performance of Llama-3.2. In Countdown, even Llama-3.2-1B outperforms Llama-3.2-3B fine-tuned by RFT after the same number of steps (250 steps). This supports the claim that UFT introduces new knowledge to the model, whereas RFT only helps the model utilize its existing knowledge [Yue et al., 2025].

## 6 Conclusion and Limitations

This paper proposes a novel fine-tuning framework, UFT, which unifies SFT and RFT. Empirically, we show that UFT outperforms both SFT and RFT in general. Specifically, by adopting UFT, small models tend to memorize while large models generalize. Theoretically, we prove that UFT achieves exponential speed-up compared to RFT. However, throughout the paper, we use only the human-annotated solutions in the dataset and GRPO as the reinforcement learning algorithm. In the future, it would be interesting to explore the incorporation of advanced SFT and RFT techniques into UFT. For instance, using long chain-of-thoughts generated by large models [Muennighoff et al., 2025, Gandhi et al., 2025] for SFT, and choosing other reinforcement learning algorithms such as REINFORCE++ [Hu, 2025] and DAPO [Yu et al., 2025] as the reinforcement learning algorithm for UFT.

## References

- Alekh Agarwal, Sham M Kakade, Jason D Lee, and Gaurav Mahajan. On the theory of policy gradient methods: Optimality, approximation, and distribution shift. *Journal of Machine Learning Research*, 22(98):1–76, 2021.
- Yekun Chai, Haoran Sun, Huang Fang, Shuohuan Wang, Yu Sun, and Hua Wu. Ma-rlhf: Reinforcement learning from human feedback with macro actions. *International Conference on Learning Representations (ICLR)*, 2025.
- Qiguang Chen, Libo Qin, Jinhao Liu, Dengyun Peng, Jiannan Guan, Peng Wang, Mengkang Hu, Yuhang Zhou, Te Gao, and Wanxiang Che. Towards reasoning era: A survey of long chain-of-thought for reasoning large language models. *arXiv preprint arXiv:2503.09567*, 2025.
- Tianzhe Chu, Yuexiang Zhai, Jihan Yang, Shengbang Tong, Saining Xie, Dale Schuurmans, Quoc V Le, Sergey Levine, and Yi Ma. Sft memorizes, rl generalizes: A comparative study of foundation model post-training. *arXiv preprint arXiv:2501.17161*, 2025.
- DeepSeek-AI, Daya Guo, Dejian Yang, Haowei Zhang, Junxiao Song, Ruoyu Zhang, Runxin Xu, Qihao Zhu, Shirong Ma, Peiyi Wang, Xiao Bi, Xiaokang Zhang, Xingkai Yu, Yu Wu, Z. F. Wu, Zhibin Gou, Zhihong Shao, Zhuoshu Li, Ziyi Gao, and Aixin Liu et al. Deepseek-rl: Incentivizing reasoning capability in llms via reinforcement learning. *arXiv preprint arXiv:2501.12948*, 2025.
- Dongsheng Ding, Kaiqing Zhang, Tamer Basar, and Mihailo Jovanovic. Natural policy gradient primal-dual method for constrained markov decision processes. *Annual Conference on Neural Information Processing Systems (NeurIPS)*, 2020.
- Omar Darwiche Domingues, Pierre Ménard, Emilie Kaufmann, and Michal Valko. Episodic reinforcement learning in finite mdps: Minimax lower bounds revisited. 2021.
- Kanishk Gandhi, Ayush Chakravarthy, Anikait Singh, Nathan Lile, and Noah D Goodman. Cognitive behaviors that enable self-improving reasoners, or, four habits of highly effective stars. *arXiv preprint arXiv:2503.01307*, 2025.
- Aaron Grattafiori, Abhimanyu Dubey, Abhinav Jauhri, Abhinav Pandey, Abhishek Kadian, Ahmad Al-Dahle, Aiesha Letman, Akhil Mathur, Alan Schelten, Alex Vaughan, Amy Yang, Angela Fan, Anirudh Goyal, Anthony Hartshorn, Aobo Yang, Archi Mitra, Archie Sravankumar, Artem Korenev, Arthur Hinsvark, and Arun Rao et al. The llama 3 herd of models. *arXiv preprint arXiv:2407.21783*, 2024.
- Dan Hendrycks, Collin Burns, Saurav Kadavath, Akul Arora, Steven Basart, Eric Tang, Dawn Song, and Jacob Steinhardt. Measuring mathematical problem solving with the math dataset. *Annual Conference on Neural Information Processing Systems (NeurIPS)*, 2021.
- Jian Hu. Reinforce++: A simple and efficient approach for aligning large language models. *arXiv preprint arXiv:2501.03262*, 2025.
- Chi Jin, Zeyuan Allen-Zhu, Sebastien Bubeck, and Michael I Jordan. Is q-learning provably efficient? *Annual Conference on Neural Information Processing Systems (NeurIPS)*, 2018.
- Sham Kakade and John Langford. Approximately optimal approximate reinforcement learning. *International Conference on Machine Learning (ICML)*, 2002.
- Pawel Ladosz, Lilian Weng, Minwoo Kim, and Hyondong Oh. Exploration in deep reinforcement learning: A survey. *Information Fusion*, 85:1–22, 2022.
- Hunter Lightman, Vineet Kosaraju, Yuri Burda, Harrison Edwards, Bowen Baker, Teddy Lee, Jan Leike, John Schulman, Ilya Sutskever, and Karl Cobbe. Let’s verify step by step. *International Conference on Learning Representations (ICLR)*, 2024.
- Mingyang Liu. On solving larger games: Designing new algorithms adaptable to deep reinforcement learning. Master’s thesis, Massachusetts Institute of Technology, 2025.

330 Mingyang Liu, Asuman E. Ozdaglar, Tiancheng Yu, and Kaiqing Zhang. The power of regularization  
331 in solving extensive-form games. *International Conference on Learning Representations (ICLR)*,  
332 2023.

333 Mingyang Liu, Gabriele Farina, and Asuman Ozdaglar. A policy-gradient approach to solving  
334 imperfect-information games with iterate convergence. *arXiv preprint arXiv:2408.00751*, 2024.

335 Zichen Liu, Changyu Chen, Wenjun Li, Tianyu Pang, Chao Du, and Min Lin. There may not be  
336 aha moment in rl-zero-like training — a pilot study. <https://oatllm.notion.site/oat-zero>,  
337 2025. Notion Blog.

338 Ilya Loshchilov and Frank Hutter. Sgdr: Stochastic gradient descent with warm restarts. *International  
339 Conference on Learning Representations (ICLR)*, 2017.

340 Liangchen Luo, Yinxiao Liu, Rosanne Liu, Samrat Phatale, Meiqi Guo, Harsh Lara, Yunxuan Li, Lei  
341 Shu, Yun Zhu, Lei Meng, et al. Improve mathematical reasoning in language models by automated  
342 process supervision. *arXiv preprint arXiv:2406.06592*, 2024.

343 Jincheng Mei, Chenjun Xiao, Csaba Szepesvari, and Dale Schuurmans. On the global convergence  
344 rates of softmax policy gradient methods. *International Conference on Machine Learning (ICML)*,  
345 2020.

346 Niklas Muennighoff, Zitong Yang, Weijia Shi, Xiang Lisa Li, Li Fei-Fei, Hannaneh Hajishirzi, Luke  
347 Zettlemoyer, Percy Liang, Emmanuel Candès, and Tatsunori Hashimoto. sl: Simple test-time  
348 scaling. *arXiv preprint arXiv:2501.19393*, 2025.

349 Jiayi Pan, Junjie Zhang, Xingyao Wang, Lifan Yuan, Hao Peng, and Alane Suhr. Tinyzero.  
350 <https://github.com/Jiayi-Pan/TinyZero>, 2025. Accessed: 2025-01-24.

351 An Yang Qwen, Baosong Yang, Beichen Zhang, Binyuan Hui, Bo Zheng, Bowen Yu, Chengyuan Li,  
352 Dayiheng Liu, Fei Huang, Haoran Wei, Huan Lin, Jian Yang, Jianhong Tu, Jianwei Zhang, Jianxin  
353 Yang, Jiayi Yang, Jingren Zhou, Junyang Lin, Kai Dang, and Keming Lu et al. Qwen2.5 technical  
354 report. *arXiv preprint arXiv:2412.15115*, 2025.

355 Amrith Setlur, Chirag Nagpal, Adam Fisch, Xinyang Geng, Jacob Eisenstein, Rishabh Agarwal,  
356 Alekh Agarwal, Jonathan Berant, and Aviral Kumar. Rewarding progress: Scaling automated  
357 process verifiers for llm reasoning. *International Conference on Learning Representations (ICLR)*,  
358 2025.

359 Zhihong Shao, Peiyi Wang, Qihao Zhu, Runxin Xu, Junxiao Song, Xiao Bi, Haowei Zhang,  
360 Mingchuan Zhang, YK Li, Y Wu, et al. Deepseekmath: Pushing the limits of mathematical  
361 reasoning in open language models. *arXiv preprint arXiv:2402.03300*, 2024.

362 Guangming Sheng, Chi Zhang, Zilingfeng Ye, Xibin Wu, Wang Zhang, Ru Zhang, Yanghua Peng,  
363 Haibin Lin, and Chuan Wu. Hybridflow: A flexible and efficient rlhf framework. *arXiv preprint  
364 arXiv: 2409.19256*, 2024.

365 Taiwei Shi, Yiyang Wu, Linxin Song, Tianyi Zhou, and Jieyu Zhao. Efficient reinforcement finetuning  
366 via adaptive curriculum learning. *arXiv preprint arXiv:2504.05520*, 2025.

367 Mingyang Song, Mao Zheng, Zheng Li, Wenjie Yang, Xuan Luo, Yue Pan, and Feng Zhang. Fastcurl:  
368 Curriculum reinforcement learning with progressive context extension for efficient training rl-like  
369 reasoning models. *arXiv preprint arXiv:2503.17287*, 2025.

370 Peiyi Wang, Lei Li, Zhihong Shao, RX Xu, Damai Dai, Yifei Li, Deli Chen, Yu Wu, and Zhifang Sui.  
371 Math-shepherd: Verify and reinforce llms step-by-step without human annotations. *arXiv preprint  
372 arXiv:2312.08935*, 2023.

373 Liang Wen, Yunke Cai, Fenrui Xiao, Xin He, Qi An, Zhenyu Duan, Yimin Du, Junchen Liu, Lifu  
374 Tang, Xiaowei Lv, et al. Light-rl: Curriculum sft, dpo and rl for long cot from scratch and beyond.  
375 *arXiv preprint arXiv:2503.10460*, 2025.

376 Wikipedia contributors. Countdown (game show). [https://en.wikipedia.org/wiki/Countdown\\_](https://en.wikipedia.org/wiki/Countdown_(game_show))  
377 [game\\_show](https://en.wikipedia.org/wiki/Countdown_(game_show))), 2025.

378 Zhiheng Xi, Wenxiang Chen, Boyang Hong, Senjie Jin, Rui Zheng, Wei He, Yiwen Ding, Shichun  
379 Liu, Xin Guo, Junzhe Wang, et al. Training large language models for reasoning through reverse  
380 curriculum reinforcement learning. *International Conference on Machine Learning (ICML)*, 2024.

381 Tian Xie, Zitian Gao, Qingnan Ren, Haoming Luo, Yuqian Hong, Bryan Dai, Joey Zhou, Kai Qiu,  
382 Zhirong Wu, and Chong Luo. Logic-rl: Unleashing llm reasoning with rule-based reinforcement  
383 learning. *arXiv preprint arXiv:2502.14768*, 2025.

384 Qiyang Yu, Zheng Zhang, Ruofei Zhu, Yufeng Yuan, Xiaochen Zuo, Yu Yue, Tiantian Fan, Gaohong  
385 Liu, Lingjun Liu, Xin Liu, et al. Dapo: An open-source llm reinforcement learning system at scale.  
386 *arXiv preprint arXiv:2503.14476*, 2025.

387 Lifan Yuan, Wendi Li, Huayu Chen, Ganqu Cui, Ning Ding, Kaiyan Zhang, Bowen Zhou, Zhiyuan  
388 Liu, and Hao Peng. Free process rewards without process labels. *arXiv preprint arXiv:2412.01981*,  
389 2024.

390 Zheng Yuan, Hongyi Yuan, Chengpeng Li, Guanting Dong, Keming Lu, Chuanqi Tan, Chang Zhou,  
391 and Jingren Zhou. Scaling relationship on learning mathematical reasoning with large language  
392 models. *arXiv preprint arXiv:2308.01825*, 2023.

393 Yang Yue, Zhiqi Chen, Rui Lu, Andrew Zhao, Zhaokai Wang, Shiji Song, and Gao Huang. Does  
394 reinforcement learning really incentivize reasoning capacity in llms beyond the base model? *arXiv*  
395 *preprint arXiv:2504.13837*, 2025.

396 Weihao Zeng, Yuzhen Huang, Qian Liu, Wei Liu, Keqing He, Zejun Ma, and Junxian He. Simplerl-  
397 zoo: Investigating and taming zero reinforcement learning for open base models in the wild. *arXiv*  
398 *preprint arXiv:2503.18892*, 2025.

399 Han Zhong, Zikang Shan, Guhao Feng, Wei Xiong, Xinle Cheng, Li Zhao, Di He, Jiang Bian,  
400 and Liwei Wang. Dpo meets ppo: Reinforced token optimization for rlhf. *arXiv preprint*  
401 *arXiv:2404.18922*, 2024.

402 Chunting Zhou, Pengfei Liu, Puxin Xu, Srinivasan Iyer, Jiao Sun, Yuning Mao, Xuezhe Ma, Avia  
403 Efrat, Ping Yu, Lili Yu, et al. Lima: Less is more for alignment. *Annual Conference on Neural*  
404 *Information Processing Systems (NeurIPS)*, 2023.

## A Related Work

In this section, we introduce related work about SFT, RFT, and curriculum learning for reasoning.

**Supervised Fine-Tuning (SFT) for Reasoning.** Different SFT methods for enhancing reasoning capability usually differ in the source of the collected reasoning trace. Zeng et al. [2025] uses traditional SFT, *i.e.*, learning from the human-annotated problem solutions. In contrast, Gandhi et al. [2025], Muennighoff et al. [2025] utilize long chain-of-thoughts solutions generated by some large models, such as Claude and Deepseek-R1 [DeepSeek-AI et al., 2025]. On the other hand, Yuan et al. [2023], Xie et al. [2025] utilizes rejection sampling fine-tuning. Specifically, the model will generate multiple reasoning traces, and the one that leads to the correct answer is selected for further fine-tuning. In this paper, we use human annotations as the SFT data (traditional SFT), as it is sufficient for our purpose and keeps the focus on our main contribution (unifying SFT and RFT).

**Reinforcement Fine-Tuning (RFT) for Reasoning.** RFT for reasoning can be categorized into process supervision and outcome supervision. Process supervision assigns a reward to each step of a long reasoning trace [Lightman et al., 2024], which evaluates whether each step is correct or not. The main drawback of process supervision is that it is costly to prepare step-by-step feedback data. On the other hand, outcome supervision assigns a single reward to the entire trace [DeepSeek-AI et al., 2025, Zeng et al., 2025, Yu et al., 2025], *e.g.*, whether the trace yields the correct answer to a math problem. Furthermore, Wang et al. [2023], Yuan et al. [2024], Zhong et al. [2024], Luo et al. [2024], Setlur et al. [2025] learn a step-by-step reward model from a collection of reasoning traces with outcome rewards, which avoids the cost of preparing step-by-step data. In this paper, due to the efficiency and simplicity of outcome supervision, we focus on the comparison with RFT using outcome supervision.

**Curriculum Learning for Reasoning.** Existing curriculum reinforcement learning for reasoning mainly focuses on utilizing a collection of problems with varying difficulties [Wen et al., 2025, Shi et al., 2025, Song et al., 2025]. These methods train the model with problems of gradually increasing difficulty, where the difficulty is determined by predefined criteria, such as the length of the successful reasoning trace [Song et al., 2025] or the success rate of baseline models [Shi et al., 2025, Wen et al., 2025]. However, such methods fail when the problems in the dataset are homogeneous in difficulty. In contrast, Xi et al. [2024] proposes a curriculum learning method that concatenates the problem with a slice of the solution (hint). The difficulty is determined by the hint length. However, Xi et al. [2024] uses a uniform distribution over all possible hint lengths, which misaligns with the distribution of interest (zero hint length). On the other hand, UFT designs a hint length scheduler that smoothly reduces the hint length to zero. Furthermore, UFT adds an additional log-likelihood term for the hint in the objective function, which helps the model to acquire new knowledge more efficiently and increases the ceiling of reinforcement learning (cf. Figure 5).

## B Experiment Details

In this section, we introduce the details of the experiments, including the pseudo-code of UFT (Appendix B.1), the hyperparameters used (Appendix B.2), and additional experiment results (Appendix B.3).

### B.1 Algorithm

This section presents the pseudo-code of UFT in Algorithm 1. In lines 4-9: we sample the hint length for each (question, solution, answer) pair in the sampled data batch  $\mathcal{B}$ . In lines 11-13, we concatenate the question with the partial solution of length  $l(t)$  and feed it into a reinforcement learning algorithm (such as GRPO), with the objective function (3.3).

### B.2 Cost and Implementation Details

The project costs roughly \$10,000 GPU hours. The experiment is based on VERL [Sheng et al., 2024] and TinyZero [Pan et al., 2025]. The hyperparameters for training on different datasets are listed in Table 1. The omitted hyperparameters follow the default values of VERL [Sheng et al., 2024].

---

**Algorithm 1:** Unified Fine-Tuning

---

**Hyperparameters:** KL-penalty coefficient  $\beta$ , total number of steps  $T$ , number of steps with hint  $T_{\text{hint}}$ , low/high probability  $p^{\text{low}}/p^{\text{high}}$  for hint sampling, and hint length  $L$

**Input:** Reference policy parameter  $\theta^{\text{ref}}$

**Initialization:**  $\theta^{(0)} \leftarrow \theta^{\text{ref}}$

```
1 for  $t = 0, 1, \dots, T - 1$  do
2   Sample a batch of problems  $\mathcal{B}$ 
3    $\mathcal{D} \leftarrow \{\}$ 
4   for  $(Q, S, A) \in \mathcal{B}$  do
5     // For each (question, solution, answer) pair
6     if  $t < T_{\text{hint}}$  then
7
8
9
10
11       
$$p^{(t)} \leftarrow p^{\text{low}} + \frac{1}{2} (p^{\text{high}} - p^{\text{low}}) \left( 1 + \cos \left( \frac{t+1}{T_{\text{hint}}} \pi \right) \right) \quad (\text{B.1})$$

12
13       // Cosine annealing,  $\pi \approx 3.14159$  is the Pi constant
14       Sample  $l^{(t)} \sim \text{Binomial}(\min\{L, \text{len}(S)\}, p^{(t)})$ 
15     else
16        $l^{(t)} = 0$ 
17     end
18      $\mathcal{D} \leftarrow \mathcal{D} \cup \{Q + S[:l^{(t)}]\}$  // Concatenate the question with the partial
19     // solution (hint) and add to  $\mathcal{D}$ 
20   end
21 end
22 Run reinforcement learning algorithm on  $\mathcal{D}$  with the objective function (3.3)
23 end
```

---

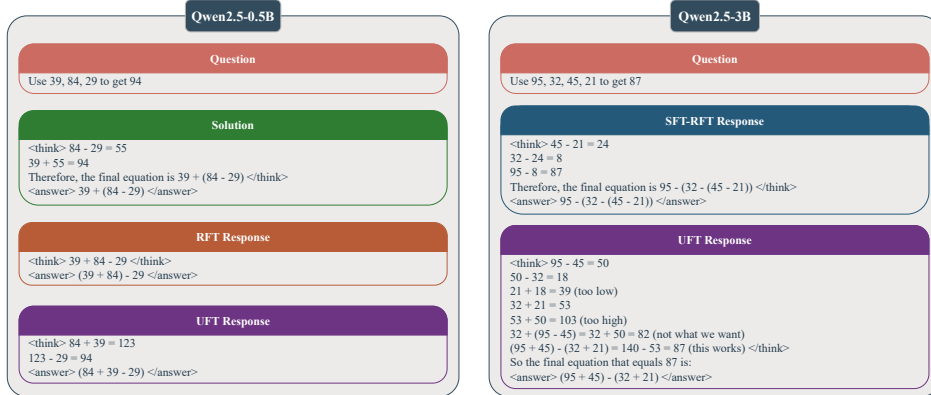

Figure 10: Responses of Qwen2.5-0.5/3B trained by different algorithms.

### B.3 Additional Results

Figure 10 shows the response of the model trained via different algorithms. For Qwen2.5-0.5B, UFT’s response aligns with the solution better than RFT’s. For Qwen2.5-3B, UFT generates a longer reasoning trace and presents skills such as verification [Gandhi et al., 2025], while SFT-RFT does not.

Table 2 shows the accuracy results across different datasets. For clarity, we report the average accuracy over models trained on three datasets: Countdown, MATH(3,4,5), and Logic.

For smaller models such as Qwen2.5-0.5B, SFT-RFT achieves an accuracy of 7.28%, compared to only 3.25% for RFT. In contrast, UFT achieves 9.45% accuracy, outperforming both.

| Data                      |                                                    |
|---------------------------|----------------------------------------------------|
| Training Batch Size       | 256                                                |
| Validation Batch Size     | 1312                                               |
| Mini-batch Size           | 64                                                 |
| Hint Length               | 5                                                  |
| Training                  |                                                    |
| $\beta$                   | 0.001                                              |
| $T$                       | 500                                                |
| $T_{\text{hint}}$         | 300                                                |
| Number of Rollouts        | 4                                                  |
| Context Window (Prompt)   | Countdown: 256<br>MATH(3,4,5): 1024<br>Logic: 1024 |
| Context Window (Response) | 1024                                               |
| $p^{\text{low}}$          | 0.05                                               |
| $p^{\text{high}}$         | 0.95                                               |
| SFT Epochs                | 5                                                  |
| Reward                    |                                                    |
| Accuracy Reward           | 1.0                                                |
| Format Correctness Reward | 0.1                                                |
| Incorrect Reward          | 0.0                                                |

Table 1: The hyperparameters for training on different datasets. The other parameters follow the default parameters of VERL [Sheng et al., 2024].

For larger models such as Qwen2.5-3B, SFT-RFT achieves 17.34% accuracy, which is significantly lower than RFT’s 32.15%. However, UFT still performs competitively, reaching 30.93% and closely matching RFT.

In summary, UFT combines the strengths of both SFT and RFT. When the model is small and memorization plays a key role, UFT matches or exceeds SFT’s performance. When the model is large and generalization becomes more important, UFT benefits similarly to RFT, achieving comparable accuracy.

## C Proof of Theorem 4.2

**Theorem 4.2** (Lowerbound). For any integers  $H \geq 1$ ,  $B \geq 2$ , and any RFT algorithm, there exists a problem with height  $H$  and branching factor  $B$ , that satisfies the following: to achieve a 50% pass@1 success rate, the algorithm needs to explore at least

$$\frac{B^H}{4} \quad (4.3)$$

nodes in  $\mathcal{S}_H$ . Moreover, when there are multiple nodes in  $\mathcal{S}_H$  representing the correct solutions, *e.g.*,  $K \geq 1$ , any algorithm needs to explore at least  $\frac{B^H}{4K}$  nodes in  $\mathcal{S}_H$ .

*Proof.* Proving the lower bound of exploration is equivalent to the following. Find the maximum  $T > 0$ , such that any algorithm will fail to learn the optimal policy with probability at least 0.5 within  $T$  explorations. Consider the  $\binom{B^H}{K}$  possible trees, each associated with a distinct subset of  $\mathcal{S}_H$  of size  $K$ , where that subset represents the correct solution for that specific tree. At the beginning, we pick an instance from all those possible trees uniformly at random.

During each exploration, the algorithm requests the reward at a node in  $\mathcal{S}_H$ . Let  $s^{(1)}, s^{(2)}, \dots, s^{(T)}$  be the leaf node reached at timestep 1, 2,  $\dots$ ,  $T$ , which are random variables depending on the randomness



| Model        | Algorithm      | MATH(3,4,5)  | AIME24      | AMC          | Countdown    | Logic        | MATH500      | Minerva      | Olympiad     | GSM8k        | Avg.         |
|--------------|----------------|--------------|-------------|--------------|--------------|--------------|--------------|--------------|--------------|--------------|--------------|
| Qwen2.5-0.5B | Base           | 3.03         | 0.00        | 0.00         | 0.00         | 0.00         | 1.73         | 0.74         | 0.30         | 7.66         | 1.55         |
|              | SFT            | 4.92         | 0.00        | 1.61         | 11.20        | 1.87         | 2.13         | 2.08         | 1.33         | 13.07        | 4.46         |
|              | RFT            | 3.78         | 0.00        | 3.21         | 8.30         | 0.00         | 2.47         | 3.80         | 2.57         | 3.87         | 3.25         |
|              | SFT-RFT        | 8.69         | 0.00        | 3.61         | <b>17.45</b> | <b>7.07</b>  | 2.07         | 4.41         | 2.12         | 16.45        | 7.28         |
|              | R <sup>3</sup> | 9.86         | 0.00        | 6.43         | 9.99         | 4.20         | 3.33         | 5.02         | <b>3.11</b>  | 20.09        | 7.36         |
|              | UFT            | <b>13.18</b> | 0.00        | <b>6.83</b>  | 17.15        | 4.87         | <b>5.40</b>  | <b>5.76</b>  | 2.77         | <b>24.59</b> | <b>9.45</b>  |
| Qwen2.5-1.5B | Base           | 24.51        | <b>3.33</b> | 4.82         | 0.20         | 2.20         | 18.27        | 4.41         | 5.48         | 60.96        | 14.29        |
|              | SFT            | 12.47        | 0.00        | 5.62         | 13.48        | 5.33         | 6.40         | 4.53         | 2.62         | 29.74        | 9.36         |
|              | RFT            | 24.77        | 2.22        | 9.24         | <b>27.86</b> | 3.00         | 10.53        | 6.86         | 6.47         | 45.69        | 16.08        |
|              | SFT-RFT        | 15.72        | 1.11        | 6.83         | 20.51        | 11.13        | 5.00         | 4.41         | 4.59         | 30.02        | 11.70        |
|              | R <sup>3</sup> | 28.12        | 2.22        | 13.65        | 23.57        | <b>11.47</b> | 14.93        | 7.48         | 9.43         | 49.79        | 18.65        |
|              | UFT            | <b>34.08</b> | <b>3.33</b> | <b>14.86</b> | 24.54        | 10.07        | <b>20.87</b> | <b>8.33</b>  | <b>9.68</b>  | <b>66.46</b> | <b>22.23</b> |
| Qwen2.5-3B   | Base           | 31.45        | 0.00        | 13.25        | 3.81         | 5.60         | 24.53        | 4.78         | 7.70         | 57.85        | 17.13        |
|              | SFT            | 24.32        | 0.00        | 10.04        | 15.07        | 10.20        | 16.80        | 5.27         | 5.19         | 45.54        | 15.25        |
|              | RFT            | 45.74        | <b>4.44</b> | 24.90        | <b>34.08</b> | <b>30.33</b> | <b>31.27</b> | 12.25        | <b>15.65</b> | <b>80.84</b> | <b>32.15</b> |
|              | SFT-RFT        | 26.50        | 1.11        | 9.64         | 17.61        | 19.60        | 14.07        | 5.76         | 6.77         | 48.22        | 17.34        |
|              | R <sup>3</sup> | 44.01        | 2.22        | 21.29        | 27.12        | 24.80        | 28.00        | 10.91        | 14.57        | 70.20        | 28.02        |
|              | UFT            | <b>47.04</b> | 3.33        | <b>29.32</b> | 31.38        | 26.07        | 29.73        | <b>12.99</b> | 14.17        | 74.63        | 30.93        |
| Llama-3.2-1B | Base           | 0.00         | 0.00        | 0.00         | 0.00         | 0.00         | 0.00         | 0.00         | 0.00         | 0.08         | 0.01         |
|              | SFT            | 1.07         | 0.00        | 0.80         | 13.41        | 3.67         | 0.00         | 0.74         | 0.25         | <b>1.87</b>  | 2.49         |
|              | RFT            | 0.94         | 0.00        | <b>2.41</b>  | 0.00         | 0.00         | <b>0.47</b>  | 0.49         | 0.84         | 1.42         | 0.80         |
|              | SFT-RFT        | 0.42         | 0.00        | 0.00         | <b>18.68</b> | <b>8.33</b>  | 0.00         | 1.23         | 0.20         | 0.48         | 3.29         |
|              | R <sup>3</sup> | <b>1.53</b>  | 0.00        | 1.61         | 9.90         | 0.13         | 0.33         | <b>2.94</b>  | <b>0.99</b>  | 1.49         | 2.20         |
|              | UFT            | 1.17         | 0.00        | 0.00         | 17.87        | 7.40         | 0.07         | 2.82         | 0.74         | 1.14         | <b>3.52</b>  |
| Llama-3.2-3B | Base           | 0.00         | 0.00        | 0.00         | 0.00         | 0.00         | 0.00         | 0.00         | 0.00         | 0.00         | 0.00         |
|              | SFT            | 2.54         | 0.00        | 0.40         | 14.68        | 6.13         | 0.00         | 1.72         | 0.54         | <b>7.08</b>  | 3.85         |
|              | RFT            | 0.00         | 0.00        | 0.00         | 0.00         | 0.00         | 0.00         | 0.00         | 0.05         | 0.00         | 0.01         |
|              | SFT-RFT        | <b>3.16</b>  | 0.00        | 2.41         | 16.05        | 8.87         | 0.07         | <b>3.92</b>  | 0.89         | 5.76         | 4.79         |
|              | R <sup>3</sup> | 2.93         | 0.00        | <b>3.21</b>  | 17.55        | <b>9.93</b>  | 0.87         | 3.06         | <b>1.04</b>  | 5.16         | <b>5.03</b>  |
|              | UFT            | 1.24         | 0.00        | 1.20         | <b>17.64</b> | 6.60         | <b>1.13</b>  | 1.10         | 0.30         | 4.12         | 3.72         |

Table 2: Average performance of Qwen2.5-0.5/1.5/3B and Llama-3.2-1/3B across all three training datasets, Countdown, MATH(3,4,5), and Logic.

of the algorithm. Let  $\mathcal{S}_H^* := \{s \in \mathcal{S}_H : \mathcal{R}(s) = \max_{s' \in \mathcal{S}_H} \mathcal{R}(s')\}$  be the set of nodes representing correct solutions. Note that given the construction of the instances,  $|\mathcal{S}_H^*| = K$ . Then, the probability of reaching one of the correct solutions in  $\mathcal{S}_H^*$  is

$$\begin{aligned} \Pr\left(\left\{s^{(t)}\right\}_{t=1}^T \cap \mathcal{S}_H^* \neq \emptyset\right) &= \sum_{t=1}^T \Pr\left(s^{(t)} \in \mathcal{S}_H^* \mid \left\{s^{(s)}\right\}_{s=1}^{t-1} \cap \mathcal{S}_H^* = \emptyset\right) \Pr\left(\left\{s^{(s)}\right\}_{s=1}^{t-1} \cap \mathcal{S}_H^* = \emptyset\right) \\ &\leq \sum_{t=1}^T \Pr\left(s^{(t)} \in \mathcal{S}_H^* \mid \left\{s^{(s)}\right\}_{s=1}^{t-1} \cap \mathcal{S}_H^* = \emptyset\right). \end{aligned}$$

Given that we pick  $\mathcal{S}_H^*$  uniformly at random,  $\Pr\left(s^{(t)} \in \mathcal{S}_H^* \mid \left\{s^{(s)}\right\}_{s=1}^{t-1} \cap \mathcal{S}_H^* = \emptyset\right) = \frac{|\mathcal{S}_H^*|}{B^H - t + 1}$ .  
Therefore,

$$\Pr\left(\left\{s^{(t)}\right\}_{t=1}^T \cap \mathcal{S}_H^* \neq \emptyset\right) \leq \sum_{t=1}^T \frac{|\mathcal{S}_H^*|}{B^H - t + 1}.$$

When  $T \leq \frac{B^H}{4|\mathcal{S}_H^*|}$ , we have

$$\Pr\left(\left\{s^{(t)}\right\}_{t=1}^T \cap \mathcal{S}_H^* \neq \emptyset\right) \leq \sum_{t=1}^T \frac{|\mathcal{S}_H^*|}{B^H - t + 1} \stackrel{(i)}{\leq} \sum_{t=1}^T \frac{2|\mathcal{S}_H^*|}{B^H} = \frac{2|\mathcal{S}_H^*|T}{B^H} \leq \frac{1}{2}.$$

(i) uses the fact that  $t \leq T \leq \frac{B^H}{4|\mathcal{S}_H^*|} \leq \frac{B^H}{2}$ . Therefore, within  $\frac{B^H}{4|\mathcal{S}_H^*|}$  exploration, the algorithm will fail to find the correct answer with probability at least 0.5.  $\square$

## D Extended Theoretical Justifications

In this section, we introduce some additional notations in Appendix D.1 and then present the theoretically sound UFT in Appendix D.2.

## 492 D.1 Extended Preliminaries

493 **Notation.** For any vector  $\mathbf{x} \in \mathbb{R}^n$ , let  $x_i$  be its  $i^{th}$  element and  $\|\mathbf{x}\|_p$  be the  $L_p$ -norm, where  $\|\mathbf{x}\|$   
 494 denotes the  $L_2$ -norm by default. For any two vectors  $\mathbf{x}, \mathbf{y} \in \mathbb{R}^n$ , let  $\langle \mathbf{x}, \mathbf{y} \rangle := \sum_{i=1}^n x_i \cdot y_i$  denote  
 495 their inner product.

496 **Softmax Parameterized Policy.** Algorithm 2 assumes the policy follows softmax parameterization.  
 497 Formally, the policy  $\pi^\theta$  is controlled by  $\theta \in \mathbb{R}^{|S| \times B}$ , such that for any  $s \in S$  and  $a \in [B]$ ,

$$\pi^\theta(a | s) := \frac{\exp(\theta(s, a))}{\sum_{a'=1}^B \exp(\theta(s, a'))}. \quad (\text{D.1})$$

498 The softmax-parameterized policy is also widely adopted in the literature [Mei et al., 2020, Agarwal  
 499 et al., 2021, Ding et al., 2020] to sidestep the complexities of analyzing non-convex neural networks  
 500 and to keep the focus on the learning algorithm itself.

## 501 D.2 Theoretically Sound UFT

502 The full algorithm is shown in Algorithm 2. In lines 2-3: we sample the hint length and a trajectory  
 503 starting from the hint. In lines 6-10, we estimate Q-values by sampling an additional trajectory for  
 504 each state-action pair, which can greatly reduce the variance of sampling. In lines 13-14, we compute  
 505 the objective function and update the parameters by gradient ascent. In lines 16-17, we estimate the  
 506 expected reward of each intermediate policy and return the best one.

507 Note that Algorithm 2 differs slightly from the UFT shown in Algorithm 1. While Algorithm 1 leaves  
 508 the choice of the reinforcement learning algorithm unspecified, Algorithm 2 explicitly defines the  
 509 trajectory rolling mechanism and update rule for concrete theoretical analysis. Further, Algorithm 2  
 510 assumes a softmax-parameterized policy, whereas Algorithm 1 imposes no constraints on the policy  
 511 network architecture.

## 512 E Proof of Theorem 4.3

513 In this section, for notational simplicity, we use  $\pi^{(t)}$  to denote  $\pi^{\theta^{(t)}}$  for any  $t \in \{0, 1, \dots, T\}$ .  
 514 Moreover, for any  $t \in [T]$ , we define  $\tilde{A}^{(t-1)}(s, a) = \tilde{Q}^{(t-1)}(s, a) = 0$  for those nodes  $s$  off the  
 515 sampled path  $\left(s_h^{(t)}\right)_{h=l^{(t)}}^H$  at timestep  $t$ .

516 **Theorem E.1 (Formal).** Consider Algorithm 2. When  $\beta \leq \frac{\Delta}{12(H+1)^2(\log B + 2\|\theta^{\text{ref}}\|_\infty)}$ , the pass @ 1  
 517 accuracy  $\Pr_{\pi_{\theta^{(\tilde{t}^*)}}}$  (pass @ 1) of policy  $\pi^{\theta^{(\tilde{t}^*)}}$  satisfies

$$\Pr_{\pi_{\theta^{(\tilde{t}^*)}}}(\text{pass @ 1}) \geq 0.5, \quad (\text{E.1})$$

518 when

$$T = \left( \frac{(H+1)^2 (\log B + 2\|\theta^{\text{ref}}\|_\infty + 7)}{\Delta/12} \right)^2 \quad (\text{E.2})$$

519 and explores no more than  $(BH + N)T$  leaf nodes in  $\mathcal{S}_H$ .

520 *Proof.* The update rule can be divided into two steps: (i) Use the concentration bound to get a  
 521 high-probability bound on  $\left\langle Q^{\pi^{(t-1)}}(s, \cdot), \pi^*(\cdot | s) - \pi^{(t-1)}(\cdot | s) \right\rangle$  (cf. Appendix E.1); (ii) Convert  
 522 the difference in each node to the  $V^* - V^{\pi^{(t-1)}}(s_{\text{root}})$  by the regret decomposition lemma (cf.  
 523 Appendix E.2); (iii) Convert the bound on expected reward to success rate (cf. Appendix E.3).

### 524 E.1 Concentration Bound

525 For any height  $h \in \{0\} \cup [H-1]$ , state  $s \in \mathcal{S}_h$ , and action  $a \in [B]$ , we can define the Q-value of  
 526 the state-action pair  $(s, a) \in \mathcal{S} \times [B]$  when following policy  $\pi$  as

$$Q^\pi(s, a) := \mathbb{E}_{s_h=s, (s_{h'})_{h'=h}^H \sim \pi} [\mathcal{R}(s_H)]. \quad (\text{E.3})$$

---

**Algorithm 2:** Theoretically Sound Unified Fine-Tuning

---

**Hyperparameters:** Learning rate  $\eta$ , KL-penalty coefficient  $\beta$ , and total number of steps  $T$ **Input:** Reference policy parameter  $\theta^{\text{ref}}$ **Initialization:**  $\theta^{(0)} \leftarrow \theta^{\text{ref}}$ 

```
1 for  $t = 0, 1, \dots, T - 1$  do
2   Sample  $l^{(t)} \sim \text{Uniform}(0, 1, 2, \dots, H - 1, H)$ 
   // In fact, any distribution with full support on  $\{0, 1, 2, \dots, H - 1, H\}$  is
   // fine. We choose the uniform distribution for simplicity
3   Sample trajectory  $(s_h^{(t)})_{h=l^{(t)}}^H \sim \pi^{\theta^{(t)}}$ , where  $s_{l^{(t)}}^{(t)} = s_{l^{(t)}}^*$ 
4   for  $h = l^{(t)}, l^{(t)} + 1, \dots, H - 1$  do
5     for  $a = 1, 2, \dots, B$  do
6       // Group sampling
7       Sample trajectory  $(s_{h'}^{(t),a})_{h'=h+1}^H \sim \pi^{\theta^{(t)}}$  starting from  $s_{h+1}^{(t),a} = \mathcal{T}(s_h^{(t)}, a)$ 
8        $\tilde{Q}^{(t)}(s_h^{(t)}, a) \leftarrow \mathcal{R}(s_H^{(t),a})$ 
9     end
10    for  $a = 1, 2, \dots, B$  do
11       $\tilde{A}^{(t)}(s_h^{(t)}, a) \leftarrow \tilde{Q}^{(t)}(s_h^{(t)}, a) - \sum_{a=1}^B \pi^{\theta^{(t)}}(a | s_h^{(t)}) \tilde{Q}^{(t)}(s_h^{(t)}, a)$ 
12    end
13    //  $\tilde{A}^{(t)}(s, \cdot) \equiv 0$  for any  $s$  off the trajectory  $(s_h^{(t)})_{h=l^{(t)}}^H$ 
14
15    
$$\mathcal{J}^{(t)} \leftarrow \sum_{h=l^{(t)}}^{H-1} \sum_{a=1}^B \pi^{\theta^{(t)}}(a | s_h^{(t)}) \tilde{A}^{(t)}(s_h^{(t)}, a)$$


$$- \beta \sum_{h=l^{(t)}}^{H-1} \text{KL}(\pi^{\theta^{(t)}}(\cdot | s_h^{(t)}) \| \pi^{\theta^{\text{ref}}}(\cdot | s_h^{(t)})) + \beta \sum_{h=0}^{l^{(t)}-1} \log \pi^{\theta^{(t)}}(a_h^* | s_h^*)$$

16
17    
$$\theta^{(t+1)} \leftarrow \theta^{(t)} + \eta \nabla_{\pi} \mathcal{J}^{(t)} \tag{D.2}$$

18 end
19 Estimate  $\tilde{V}^{\pi^{\theta^{(t)}}}(s_{\text{root}}) = \frac{1}{N} \sum_{n=1}^N \mathcal{R}(\tilde{s}_H^{(t),n})$  by sampling trajectories  $\tilde{s}_0^{(t),n} = s_{\text{root}}$  and
20  $(\tilde{s}_h^{(t),n})_{h=0}^H \sim \pi^{\theta^{(t)}}$ , where  $N = \frac{72 \log(14(T+1))}{\Delta^2}$ 
21  $\tilde{t}^* = \text{argmax}_{t \in \{0, 1, \dots, T\}} \tilde{V}^{\pi^{\theta^{(t)}}}(s_{\text{root}})$ 
22 Return:  $\pi^{\theta^{(\tilde{t}^*)}}$ 
```

---

527 Then, for any  $s \in \mathcal{S} \setminus \mathcal{S}_H$  and  $t \in [T]$ , we have

$$\mathbb{E} [\tilde{Q}^{(t-1)}(s, a)] = \Pr \left( s \in \left\{ s_h^{(t)} \right\}_{h=l^{(t)}}^H \right) \cdot Q^{\pi^{(t-1)}}(s, a), \tag{E.4}$$

528 where the expectation is taken over the probability of sampling trajectories in Algorithm 2. Next, we  
529 will introduce Lemma 5.3 in Liu et al. [2024].

530 **Proposition E.2.** Let  $M, \widetilde{M} \geq 0$  be the constants such that  $|f^{(t)}(x) - f^{(t)}(x')| \leq M$  and  
531  $|\tilde{f}^{(t)}(x) - \tilde{f}^{(t)}(x')| \leq \widetilde{M}$  for any  $t \in [T]$  and  $x, x' \in \mathcal{C}$ , where  $\mathcal{C}$  is a convex set. If for any

532  $\mathbf{x} \in \mathcal{C}$ , we have

$$\mathbb{E} \left[ \tilde{f}^{(t)}(\mathbf{x}) \mid \tilde{f}^{(1)}, \tilde{f}^{(2)}, \dots, \tilde{f}^{(t-1)} \right] = f^{(t)}(\mathbf{x}),$$

533 and  $\mathbf{x}^{(t)}$  is deterministically influenced by  $\tilde{f}^{(1)}, \tilde{f}^{(2)}, \dots, \tilde{f}^{(t-1)}$ , then for any  $\delta \in (0, 1)$  and  $\mathbf{x} \in \mathcal{C}$ ,  
 534 we have

$$\Pr \left( \sum_{t=1}^T \left( f^{(t)}(\mathbf{x}) - f^{(t)}(\mathbf{x}^{(t)}) \right) \leq \sum_{t=1}^T \left( \tilde{f}^{(t)}(\mathbf{x}) - \tilde{f}^{(t)}(\mathbf{x}^{(t)}) \right) + (M + \widetilde{M}) \sqrt{2T \log \frac{1}{\delta}} \right) \geq 1 - \delta.$$

535 For any  $h < H$  and  $s \in \mathcal{S}_h$ , let  $f^{(t)}(\mathbf{x}) = \Pr \left( s \in \left\{ s_h^{(t-1)} \right\}_{h=l^{(t-1)}}^H \right) \left\langle Q^{\pi^{(t-1)}}(s, \cdot), \mathbf{x} \right\rangle$ , where  
 536  $f^{(t)}: \Delta^B \rightarrow [0, 1]$  since each element of  $Q^{(t-1)}(s, \cdot)$  is bounded by  $[0, 1]$  by definition. Therefore,  
 537  $M$  in Proposition E.2 is 1. Similarly, let  $\tilde{f}^{(t)}(\mathbf{x}) = \left\langle \tilde{Q}^{(t-1)}(s, \cdot), \mathbf{x} \right\rangle$  and we have  $\widetilde{M} = 1$ . Therefore,  
 538 by (E.4), Proposition E.2, and Lemma E.3, for any  $\delta \in (0, 1)$ , with probability at least  $1 - \delta$ , we have

$$\begin{aligned} & \sum_{t=1}^T \Pr \left( s \in \left\{ s_h^{(t)} \right\}_{h=l^{(t)}}^H \right) \left\langle Q^{\pi^{(t-1)}}(s, \cdot), \pi^*(\cdot | s) - \pi^{(t-1)}(\cdot | s) \right\rangle \\ & \leq \sum_{t=1}^T \left\langle \tilde{Q}^{(t-1)}(s, \cdot), \pi^*(\cdot | s) - \pi^{(t-1)}(\cdot | s) \right\rangle + 2\sqrt{2T \log \frac{1}{\delta}} \\ & \stackrel{(i)}{=} \sum_{t=1}^T \left\langle \tilde{A}^{(t-1)}(s, \cdot), \pi^*(\cdot | s) - \pi^{(t-1)}(\cdot | s) \right\rangle + 2\sqrt{2T \log \frac{1}{\delta}}. \end{aligned}$$

539 (i) is because

$$\begin{aligned} & \left\langle \tilde{A}^{(t-1)}(s, \cdot), \pi^*(\cdot | s) - \pi^{(t-1)}(\cdot | s) \right\rangle \\ & = \left\langle \tilde{Q}^{(t-1)}(s, \cdot), \pi^*(\cdot | s) - \pi^{(t-1)}(\cdot | s) \right\rangle \\ & \quad + \sum_{a=1}^B \pi^{(t-1)}(a | s) \tilde{Q}^{(t-1)}(s, a) \sum_{a=1}^B \left( \pi^*(a | s) - \pi^{(t-1)}(a | s) \right) \\ & = \left\langle \tilde{Q}^{(t-1)}(s, \cdot), \pi^*(\cdot | s) - \pi^{(t-1)}(\cdot | s) \right\rangle. \end{aligned}$$

540 By the update rule of Algorithm 2, we have the following lemma.

541 **Lemma E.3.** Consider Algorithm 2. For any node  $s \in \mathcal{S} \setminus \mathcal{S}_H$ , we have

$$\begin{aligned} & \sum_{t=1}^T \left\langle \tilde{A}^{(t-1)}(s, \cdot), \pi^*(\cdot | s) - \pi^{(t-1)}(\cdot | s) \right\rangle \\ & \leq \left( \frac{1}{\eta} + \beta T \right) \text{KL} \left( \pi^*(\cdot | s) \parallel \pi^{\boldsymbol{\theta}^{\text{ref}}}(\cdot | s) \right) + 2\eta T. \end{aligned}$$

542 The proof is postponed to Appendix E.4. Lemma E.3 gives us an upper bound on the accumulated  
 543 difference between our policy  $\pi^{(t-1)}$  and the optimal policy  $\pi^*$ . Therefore,

$$\begin{aligned} & \sum_{t=1}^T \Pr \left( s \in \left\{ s_h^{(t)} \right\}_{h=l^{(t)}}^H \right) \left\langle Q^{\pi^{(t-1)}}(s, \cdot), \pi^*(\cdot | s) - \pi^{(t-1)}(\cdot | s) \right\rangle \\ & \leq \sum_{t=1}^T \left\langle \tilde{A}^{(t-1)}(s, \cdot), \pi^*(\cdot | s) - \pi^{(t-1)}(\cdot | s) \right\rangle + 2\sqrt{2T \log \frac{1}{\delta}} \\ & \leq \left( \frac{1}{\eta} + \beta T \right) \text{KL} \left( \pi^*(\cdot | s) \parallel \pi^{\boldsymbol{\theta}^{\text{ref}}}(\cdot | s) \right) + 2\eta T + 2\sqrt{2T \log \frac{1}{\delta}}. \end{aligned}$$

## 544 E.2 Difference Decomposition

545 Let  $\mu^\pi(s)$  be the probability of reaching state  $s$  from the root by following policy  $\pi$ . Hence,  
 546  $\mu^\pi(s_{\text{root}}) = 1$ . For any  $s \in \mathcal{S} \setminus \mathcal{S}_H$  and action  $a \in [B]$ ,  $\mu^\pi(\mathcal{T}(s, a))$  can be recursively defined as

$$\mu^\pi(\mathcal{T}(s, a)) = \mu^\pi(s) \cdot \pi(s, a). \quad (\text{E.5})$$

547 In the following, we will introduce Lemma E.4, which is a special case of the regret decomposition  
 548 lemma (Lemma 5.1) in Liu et al. [2023]. Specifically, it is the regret decomposition lemma for a  
 549 two-player zero-sum extensive-form game without chance nodes<sup>5</sup>, and the second player's action sets  
 550 at all nodes are of size 1.

551 **Lemma E.4.** For any sequence of policies  $\pi^{(1)}, \pi^{(2)}, \dots, \pi^{(T)}$  and policy  $\pi$ , we have

$$\sum_{t=1}^T \left( V^\pi(s_{\text{root}}) - V^{\pi^{(t)}}(s_{\text{root}}) \right) = \sum_{s \in \mathcal{S} \setminus \mathcal{S}_H} \mu^\pi(s) \sum_{t=1}^T \left\langle Q^{\pi^{(t)}}(s, \cdot), \pi(\cdot | s) - \pi^{(t)}(\cdot | s) \right\rangle.$$

552 Lemma E.4 can also be viewed as the performance difference lemma in reinforcement learning  
 553 [Kakade and Langford, 2002] for a tree-shape Markov decision process. For completeness, we also  
 554 provide the proof at the end of this section.

555 By letting  $\pi^{(t)} = \pi^{(t-1)}$  for any  $t \in [T]$  and  $\pi = \pi^*$ , we have

$$\begin{aligned} & \sum_{t=1}^T \left( V^* - V^{\pi^{(t-1)}}(s_{\text{root}}) \right) \\ &= \sum_{s \in \mathcal{S} \setminus \mathcal{S}_H} \mu^{\pi^*}(s) \sum_{t=1}^T \left\langle Q^{\pi^{(t-1)}}(s, \cdot), \pi^*(\cdot | s) - \pi^{(t-1)}(\cdot | s) \right\rangle \\ &\stackrel{(i)}{=} \sum_{s \in \{s_0^*, s_1^*, \dots, s_{H-1}^*\}} \mu^{\pi^*}(s) \sum_{t=1}^T \left\langle Q^{\pi^{(t-1)}}(s, \cdot), \pi^*(\cdot | s) - \pi^{(t-1)}(\cdot | s) \right\rangle \\ &= \sum_{s \in \{s_0^*, s_1^*, \dots, s_{H-1}^*\}} \sum_{t=1}^T \frac{\mu^{\pi^*}(s)}{\Pr\left(s \in \left\{s_h^{(t)}\right\}_{h=l(t)}^H\right)} \Pr\left(s \in \left\{s_h^{(t)}\right\}_{h=l(t)}^H\right) \\ &\quad \cdot \left\langle Q^{\pi^{(t-1)}}(s, \cdot), \pi^*(\cdot | s) - \pi^{(t-1)}(\cdot | s) \right\rangle. \end{aligned}$$

556 (i) uses the fact that  $\pi^*$  is deterministic such that  $\mu^{\pi^*}(s) > 0$  only when  $s \in \{s_0^*, s_1^*, \dots, s_H^*\}$ . Since  
 557  $s_{l(t)}^{(t)}$  is sampled from  $\{s_0^*, s_1^*, \dots, s_H^*\}$  uniformly, for any  $s \in \{s_0^*, s_1^*, \dots, s_H^*\}$ , we have

$$\Pr\left(s \in \left\{s_h^{(t)}\right\}_{h=l(t)}^H\right) \geq \Pr\left(s = s_{l(t)}^{(t)}\right) = \frac{1}{H+1}.$$

558 Therefore,  $\frac{\mu^{\pi^*}(s)}{\Pr\left(s \in \left\{s_h^{(t)}\right\}_{h=l(t)}^H\right)} \leq H+1$  and we have

$$\begin{aligned} & \sum_{t=1}^T \left( V^* - V^{\pi^{(t-1)}}(s_{\text{root}}) \right) \\ &\leq \sum_{h=0}^{H-1} \frac{\mu^{\pi^*}(s_h^*)}{\Pr\left(s_h^* \in \left\{s_h^{(t)}\right\}_{h=l(t)}^H\right)} \left( \left( \frac{1}{\eta} + \beta T \right) \text{KL}\left(\pi^*(\cdot | s_h^*) \| \pi^{\theta^{\text{ref}}}(\cdot | s_h^*)\right) + 2\eta T + 2\sqrt{2T \log \frac{1}{\delta}} \right) \\ &\leq (H+1) \sum_{h=0}^{H-1} \left( \left( \frac{1}{\eta} + \beta T \right) \text{KL}\left(\pi^*(\cdot | s_h^*) \| \pi^{\theta^{\text{ref}}}(\cdot | s_h^*)\right) + 2\eta T + 2\sqrt{2T \log \frac{1}{\delta}} \right). \end{aligned}$$

559 Next, we can bound  $\text{KL}\left(\pi^*(\cdot | s_h^*) \| \pi^{\theta^{\text{ref}}}(\cdot | s_h^*)\right)$  by the following lemma.

<sup>5</sup>Chance nodes represent the randomness of the game, such as rolling a dice.

560 **Lemma E.5.** For any  $h \in \{0, 1, \dots, H-1\}$ , we have

$$\text{KL} \left( \pi^*(\cdot | s_h^*) \| \pi^{\theta^{\text{ref}}}(\cdot | s_h^*) \right) \leq \log B + 2 \|\theta^{\text{ref}}\|_{\infty}.$$

561 The proof is postponed to Appendix E.4.

562 Therefore, by taking  $\eta = \frac{1}{\sqrt{T}}$ , we have

$$\begin{aligned} & \sum_{t=1}^T \left( V^* - V^{\pi^{(t-1)}}(s_{\text{root}}) \right) \\ & \leq (H+1)^2 \left( (\log B + 2 \|\theta^{\text{ref}}\|_{\infty}) \sqrt{T} + 2\sqrt{T} + 2\sqrt{2T \log \frac{1}{\delta}} \right) \\ & \quad + \beta T (H+1) \sum_{h=0}^{H-1} \text{KL} \left( \pi^*(\cdot | s_h^*) \| \pi^{\theta^{\text{ref}}}(\cdot | s_h^*) \right). \end{aligned}$$

563 Because  $V^* - V^{\pi^{(t-1)}}(s_{\text{root}}) \geq 0$  for any  $t \in [T]$ , according to pigeon hole principle, there must  
564 exist  $t^* \in \{0, 1, \dots, T\}$  such that

$$\begin{aligned} & V^* - V^{\pi^{(t^*)}}(s_{\text{root}}) \\ & \leq \frac{(H+1)^2 \left( (\log B + 2 \|\theta^{\text{ref}}\|_{\infty}) + 2 + 2\sqrt{2 \log \frac{1}{\delta}} \right)}{\sqrt{T}} \\ & \quad + \beta (H+1) \sum_{h=0}^{H-1} \text{KL} \left( \pi^*(\cdot | s_h^*) \| \pi^{\theta^{\text{ref}}}(\cdot | s_h^*) \right). \end{aligned}$$

565 For any  $\epsilon > \beta (H+1) \sum_{h=0}^{H-1} \text{KL} \left( \pi^*(\cdot | s_h^*) \| \pi^{\theta^{\text{ref}}}(\cdot | s_h^*) \right)$ , it takes

$$\left( \frac{(H+1)^2 \left( (\log B + 2 \|\theta^{\text{ref}}\|_{\infty}) + 2 + 2\sqrt{2 \log \frac{1}{\delta}} \right)}{\epsilon - \beta (H+1) \sum_{h=0}^{H-1} \text{KL} \left( \pi^*(\cdot | s_h^*) \| \pi^{\theta^{\text{ref}}}(\cdot | s_h^*) \right)} \right)^2$$

566 iterations to satisfy  $V^* - V^{\pi^{(t^*)}}(s_{\text{root}}) \leq \epsilon$ .

567 Recall that  $\Delta > 0$  is the sub-optimality gap. By picking  $\epsilon = \frac{\Delta}{6}$ ,  $\delta = \frac{1}{8}$ , and  $\beta \leq$   
568  $\frac{\Delta}{12(H+1)^2 (\log B + 2 \|\theta^{\text{ref}}\|_{\infty})}$ , to get  $\epsilon$  accuracy with probability  $1 - \delta$ , we need

$$T = \left( \frac{(H+1)^2 (\log B + 2 \|\theta^{\text{ref}}\|_{\infty} + 7)}{\Delta/12} \right)^2$$

569 iterations, which implies  $T \leq \mathcal{O} \left( \frac{H^4 (\log B)^2}{\Delta^2} \right)$ . Since  $\mathcal{O}(B \cdot H)$  leaf nodes are explored at each  
570 iteration, the number of leaf nodes explored during training is  $\mathcal{O}(B \cdot H \cdot T) \leq \mathcal{O} \left( B \frac{H^5 (\log B)^2}{\Delta^2} \right)$ .

### 571 E.3 Compute Probability

572 To find  $t^*$ , we need to estimate  $V^{\pi^{\theta^{(t)}}}$  for all  $t \in \{0, 1, \dots, T\}$  by sampling trajectories. By  
573 sampling a trajectory from  $\pi^{\theta^{(t)}}$ , we can get a random variable from Bernoulli  $\left( \Pr_{\pi^{(t)}}^{\text{cond}}(\text{pass @ 1}) \right)$   
574 representing whether the trajectory reaches the correct solution. Then, by Hoeffding's inequality, by  
575 sampling  $N$  trajectories, we have

$$\Pr \left( \left| \tilde{V}^{\pi^{\theta^{(t)}}}(s_{\text{root}}) - V^{\pi^{\theta^{(t)}}}(s_{\text{root}}) \right| \leq \frac{\Delta}{12} \right) \leq 2 \exp \left( -\frac{N\Delta^2}{72} \right) \stackrel{(i)}{=} \frac{1}{7(T+1)}. \quad (\text{E.6})$$

(i) is by definition of  $N$  in Algorithm 2. By union bound, for any  $t \in \{0, 1, \dots, T\}$ ,  
 $\left| \tilde{V}^{\pi^{\theta^{(t)}}}(s_{\text{root}}) - V^{\pi^{\theta^{(t)}}}(s_{\text{root}}) \right| \leq \frac{\Delta}{12}$  holds with probability at least  $1 - \frac{T+1}{7(T+1)} = \frac{6}{7}$ . Therefore,

$$\begin{aligned} V^{\pi^{\theta^{(\tilde{t}^*)}}}(s_{\text{root}}) &\geq \tilde{V}^{\pi^{\theta^{(\tilde{t}^*)}}}(s_{\text{root}}) - \frac{\Delta}{12} \geq \tilde{V}^{\pi^{\theta^{(t^*)}}}(s_{\text{root}}) - \frac{\Delta}{12} \\ &\geq V^{\pi^{\theta^{(t^*)}}}(s_{\text{root}}) - \frac{\Delta}{6} \geq V^* - \epsilon - \frac{\Delta}{6} = V^* - \frac{\Delta}{3}. \end{aligned}$$

Recall that  $\Pr_{\pi(\tilde{t}^*)}(\text{pass @ 1})$  is the pass @ 1 accuracy of policy  $\pi(\tilde{t}^*)$ . In the following, we will use  $\Pr^{\text{cond}}$  as a shorthand of  $\Pr(\cdot \mid V^{\pi(\tilde{t}^*)}(s_{\text{root}}) \geq V^* - \frac{\Delta}{3})$ .

$$\begin{aligned} \Pr_{\pi(\tilde{t}^*)}^{\text{cond}}(\text{pass @ 1}) &= \Pr_{s_0=s_{\text{root}}, (s_h)_{h=0}^H \sim \pi(\tilde{t}^*)}^{\text{cond}} \left( \mathcal{R}(s_H) = \max_{s'_H \in \mathcal{S}_H} \mathcal{R}(s'_H) \right) \\ &= \Pr_{s_0=s_{\text{root}}, (s_h)_{h=0}^H \sim \pi(\tilde{t}^*)}^{\text{cond}} (\mathcal{R}(s_H) = V^*). \end{aligned}$$

Furthermore,

$$\begin{aligned} V^* - \frac{\Delta}{3} &\leq V^{\pi(\tilde{t}^*)}(s_{\text{root}}) = \mathbb{E}_{s_0=s_{\text{root}}, (s_h)_{h=0}^H \sim \pi(\tilde{t}^*)} [\mathcal{R}(s_H)] \\ &\leq \Pr_{s_0=s_{\text{root}}, (s_h)_{h=0}^H \sim \pi(\tilde{t}^*)}^{\text{cond}} (\mathcal{R}(s_H) = V^*) V^* \\ &\quad + \left( 1 - \Pr_{s_0=s_{\text{root}}, (s_h)_{h=0}^H \sim \pi(\tilde{t}^*)}^{\text{cond}} (\mathcal{R}(s_H) = V^*) \right) (V^* - \Delta). \end{aligned}$$

By combining all pieces together, we have

$$\begin{aligned} &\Pr_{\pi(\tilde{t}^*)}^{\text{cond}}(\text{pass @ 1}) V^* + \left( 1 - \Pr_{\pi(\tilde{t}^*)}^{\text{cond}}(\text{pass @ 1}) \right) (V^* - \Delta) \\ &\geq V^* - \frac{\Delta}{3}, \end{aligned}$$

which implies that  $\Pr_{\pi(\tilde{t}^*)}^{\text{cond}}(\text{pass @ 1}) \geq \frac{2}{3}$ .

Finally,

$$\begin{aligned} &\Pr_{\pi(\tilde{t}^*)}(\text{pass @ 1}) \\ &\geq \Pr_{\pi(\tilde{t}^*)}^{\text{cond}}(\text{pass @ 1}) \Pr \left( V^{\pi(\tilde{t}^*)}(s_{\text{root}}) \geq V^* - \epsilon \right) \Pr \left( V^{\pi(\tilde{t}^*)}(s_{\text{root}}) \geq V^{\pi(\tilde{t}^*)}(s_{\text{root}}) - \frac{\Delta}{6} \right) \\ &\geq \frac{2}{3} (1 - \delta) \frac{6}{7} = \frac{1}{2}. \end{aligned} \quad \square$$

#### E.4 Omitted Proofs

**Lemma E.3.** Consider Algorithm 2. For any node  $s \in \mathcal{S} \setminus \mathcal{S}_H$ , we have

$$\begin{aligned} &\sum_{t=1}^T \left\langle \tilde{A}^{(t-1)}(s, \cdot), \pi^*(\cdot \mid s) - \pi^{(t-1)}(\cdot \mid s) \right\rangle \\ &\leq \left( \frac{1}{\eta} + \beta T \right) \text{KL} \left( \pi^*(\cdot \mid s) \parallel \pi^{\theta^{\text{ref}}}(\cdot \mid s) \right) + 2\eta T. \end{aligned}$$

*Proof.* We will introduce the following one-step analysis of the update rule first.

**Lemma E.6.** For any node  $s \in \mathcal{S} \setminus \mathcal{S}_H$  and  $t \in [T]$ , we have

$$\begin{aligned} &\eta \left\langle \tilde{A}^{(t-1)}(s, \cdot), \pi^*(\cdot \mid s) - \pi^{(t)}(\cdot \mid s) \right\rangle \\ &\leq \text{KL} \left( \pi^*(\cdot \mid s) \parallel \pi^{(t-1)}(\cdot \mid s) \right) - \text{KL} \left( \pi^*(\cdot \mid s) \parallel \pi^{(t)}(\cdot \mid s) \right) - \text{KL} \left( \pi^{(t)}(\cdot \mid s) \parallel \pi^{(t-1)}(\cdot \mid s) \right) \\ &\quad + \eta \beta \text{KL} \left( \pi^*(\cdot \mid s) \parallel \pi^{\theta^{\text{ref}}}(\cdot \mid s) \right). \end{aligned}$$



588 The proof is presented later in this section. Therefore,

$$\begin{aligned} & \eta \left\langle \tilde{A}^{(t-1)}(s, \cdot), \pi^*(\cdot | s) - \pi^{(t)}(\cdot | s) \right\rangle \\ & \leq \text{KL} \left( \pi^*(\cdot | s) \| \pi^{(t-1)}(\cdot | s) \right) - \text{KL} \left( \pi^*(\cdot | s) \| \pi^{(t)}(\cdot | s) \right) - \text{KL} \left( \pi^{(t)}(\cdot | s) \| \pi^{(t-1)}(\cdot | s) \right) \\ & \quad + \eta \beta \text{KL} \left( \pi^*(\cdot | s) \| \pi^{\theta^{\text{ref}}}(\cdot | s) \right). \end{aligned}$$

589 By adding  $\eta \left\langle \tilde{A}^{(t-1)}(s, \cdot), \pi^{(t)}(\cdot | s) - \pi^{(t-1)}(\cdot | s) \right\rangle$  on both sides, we have

$$\begin{aligned} & \eta \left\langle \tilde{A}^{(t-1)}(s, \cdot), \pi^*(\cdot | s) - \pi^{(t-1)}(\cdot | s) \right\rangle \\ & \stackrel{(i)}{\leq} \text{KL} \left( \pi^*(\cdot | s) \| \pi^{(t-1)}(\cdot | s) \right) - \text{KL} \left( \pi^*(\cdot | s) \| \pi^{(t)}(\cdot | s) \right) - \text{KL} \left( \pi^{(t)}(\cdot | s) \| \pi^{(t-1)}(\cdot | s) \right) \\ & \quad + \eta \left\langle \tilde{A}^{(t-1)}(s, \cdot), \pi^{(t)}(\cdot | s) - \pi^{(t-1)}(\cdot | s) \right\rangle + \eta \beta \text{KL} \left( \pi^*(\cdot | s) \| \pi^{\theta^{\text{ref}}}(\cdot | s) \right). \end{aligned}$$

590 By Hölder's inequality, we have

$$\begin{aligned} & \left\langle \tilde{A}^{(t-1)}(s, \cdot), \pi^{(t)}(\cdot | s) - \pi^{(t-1)}(\cdot | s) \right\rangle \\ & \leq \left\| \tilde{A}^{(t-1)}(s, \cdot) \right\|_{\infty} \cdot \left\| \pi^{(t)}(\cdot | s) - \pi^{(t-1)}(\cdot | s) \right\|_1 \\ & \leq 2\eta \left\| \tilde{A}^{(t-1)}(s, \cdot) \right\|_{\infty}^2 + \frac{1}{8\eta} \left\| \pi^{(t)}(\cdot | s) - \pi^{(t-1)}(\cdot | s) \right\|_1^2 \\ & \stackrel{(i)}{\leq} 2\eta + \frac{1}{4\eta} \text{KL} \left( \pi^{(t)}(\cdot | s) \| \pi^{(t-1)}(\cdot | s) \right). \end{aligned}$$

591 (i) uses  $\left\| \tilde{A}^{(t-1)}(s, \cdot) \right\|_{\infty} \leq 1$  and Pinsker's inequality. Therefore,

$$\begin{aligned} & \eta \left\langle \tilde{A}^{(t-1)}(s, \cdot), \pi^*(\cdot | s) - \pi^{(t-1)}(\cdot | s) \right\rangle \\ & \leq \text{KL} \left( \pi^*(\cdot | s) \| \pi^{(t-1)}(\cdot | s) \right) - \text{KL} \left( \pi^*(\cdot | s) \| \pi^{(t)}(\cdot | s) \right) + 2\eta^2 + \eta \beta \text{KL} \left( \pi^*(\cdot | s) \| \pi^{\theta^{\text{ref}}}(\cdot | s) \right). \end{aligned}$$

592 By telescoping, we have

$$\begin{aligned} & \eta \sum_{t=1}^T \left\langle \tilde{A}^{(t-1)}(s, \cdot), \pi^*(\cdot | s) - \pi^{(t-1)}(\cdot | s) \right\rangle \\ & \leq \text{KL} \left( \pi^*(\cdot | s) \| \pi^{(0)}(\cdot | s) \right) - \text{KL} \left( \pi^*(\cdot | s) \| \pi^{(T)}(\cdot | s) \right) + 2\eta^2 T + \eta \beta \text{KL} \left( \pi^*(\cdot | s) \| \pi^{\theta^{\text{ref}}}(\cdot | s) \right) T \\ & \stackrel{(i)}{\leq} \text{KL} \left( \pi^*(\cdot | s) \| \pi^{(0)}(\cdot | s) \right) + 2\eta^2 T + \eta \beta \text{KL} \left( \pi^*(\cdot | s) \| \pi^{\theta^{\text{ref}}}(\cdot | s) \right) T. \end{aligned}$$

593 (i) uses the non-negativity of KL-divergence. By dividing  $\eta$  on both sides, we have

$$\begin{aligned} & \sum_{t=1}^T \left\langle \tilde{A}^{(t-1)}(s, \cdot), \pi^*(\cdot | s) - \pi^{(t-1)}(\cdot | s) \right\rangle \\ & \leq \frac{1}{\eta} \text{KL} \left( \pi^*(\cdot | s) \| \pi^{(0)}(\cdot | s) \right) + 2\eta T + \beta \text{KL} \left( \pi^*(\cdot | s) \| \pi^{\theta^{\text{ref}}}(\cdot | s) \right) T \\ & \stackrel{(i)}{=} \frac{1}{\eta} \text{KL} \left( \pi^*(\cdot | s) \| \pi^{\theta^{\text{ref}}}(\cdot | s) \right) + 2\eta T + \beta \text{KL} \left( \pi^*(\cdot | s) \| \pi^{\theta^{\text{ref}}}(\cdot | s) \right) T. \end{aligned}$$

594 (i) is because  $\pi^{(0)}(\cdot | s) = \pi^{\theta^{\text{ref}}}(\cdot | s)$  by the initialization of Algorithm 2. □

595 **Lemma E.4.** For any sequence of policies  $\pi^{(1)}, \pi^{(2)}, \dots, \pi^{(T)}$  and policy  $\pi$ , we have

$$\sum_{t=1}^T \left( V^{\pi}(s_{\text{root}}) - V^{\pi^{(t)}}(s_{\text{root}}) \right) = \sum_{s \in \mathcal{S} \setminus \mathcal{S}_H} \mu^{\pi}(s) \sum_{t=1}^T \left\langle Q^{\pi^{(t)}}(s, \cdot), \pi(\cdot | s) - \pi^{(t)}(\cdot | s) \right\rangle.$$

596 *Proof.* The lemma can be proved by induction. When  $H = 1$ , Lemma E.4 holds since  
 597  $Q^{\pi^{(t)}}(s_{\text{root}}, a) = \mathcal{R}(\mathcal{T}(s_{\text{root}}, a)) = Q^{\pi}(s_{\text{root}}, a)$  for any action  $a \in [B]$  and  $t \in [T]$ . There-  
 598 fore,

$$\begin{aligned} & \sum_{s \in \mathcal{S} \setminus \mathcal{S}_H} \sum_{t=1}^T \mu^{\pi}(s) \left\langle Q^{\pi^{(t)}}(s, \cdot), \pi(\cdot | s) - \pi^{(t)}(\cdot | s) \right\rangle \\ &= \sum_{t=1}^T \mu^{\pi}(s_{\text{root}}) \left( \left\langle Q^{\pi}(s_{\text{root}}, \cdot), \pi(\cdot | s_{\text{root}}) \right\rangle - \left\langle Q^{\pi^{(t)}}(s_{\text{root}}, \cdot), \pi^{(t)}(\cdot | s_{\text{root}}) \right\rangle \right) \\ &= \sum_{t=1}^T \left( V^{\pi}(s_{\text{root}}) - V^{\pi^{(t)}}(s_{\text{root}}) \right). \end{aligned}$$

599 For any two nodes  $s, s'$ , we write  $s \sqsubseteq s'$  if  $s$  is an ancestor of  $s'$  in the search tree. Consider when  
 600 Lemma E.4 holds for any search tree of height  $H \leq H_0$ . Then, for  $H = H_0 + 1$ , we have

$$\begin{aligned} & \sum_{s \in \mathcal{S} \setminus \mathcal{S}_H} \sum_{t=1}^T \mu^{\pi}(s) \left\langle Q^{\pi^{(t)}}(s, \cdot), \pi(\cdot | s) - \pi^{(t)}(\cdot | s) \right\rangle \\ &= \sum_{t=1}^T \mu^{\pi}(s_{\text{root}}) \left\langle Q^{\pi^{(t)}}(s_{\text{root}}, \cdot), \pi(\cdot | s_{\text{root}}) - \pi^{(t)}(\cdot | s_{\text{root}}) \right\rangle \\ & \quad + \sum_{a=1}^B \sum_{s \in \mathcal{S} \setminus \mathcal{S}_H : \mathcal{T}(s_{\text{root}}, a) \sqsubseteq s} \sum_{t=1}^T \mu^{\pi}(s) \left\langle Q^{\pi^{(t)}}(s, \cdot), \pi(\cdot | s) - \pi^{(t)}(\cdot | s) \right\rangle. \end{aligned}$$

601 Then, according to the induction hypothesis, for any  $a \in [B]$ , since the subtree rooted at  $\mathcal{T}(s_{\text{root}}, a)$   
 602 is a tree of height  $H_0$ , we have

$$\begin{aligned} & \sum_{s \in \mathcal{S} \setminus \mathcal{S}_H : \mathcal{T}(s_{\text{root}}, a) \sqsubseteq s} \sum_{t=1}^T \mu^{\pi}(s) \left\langle Q^{\pi^{(t)}}(s, \cdot), \pi(\cdot | s) - \pi^{(t)}(\cdot | s) \right\rangle \\ &= \pi(a | s_{\text{root}}) \sum_{t=1}^T \left( V^{\pi}(\mathcal{T}(s_{\text{root}}, a)) - V^{\pi^{(t)}}(\mathcal{T}(s_{\text{root}}, a)) \right). \end{aligned}$$

603 Moreover, by definition, we have  $Q^{\pi^{(t)}}(s_{\text{root}}, a) = V^{\pi^{(t)}}(\mathcal{T}(s_{\text{root}}, a))$ . Therefore,

$$\begin{aligned} & \sum_{s \in \mathcal{S} \setminus \mathcal{S}_H} \sum_{t=1}^T \mu^{\pi}(s) \left\langle Q^{\pi^{(t)}}(s, \cdot), \pi(\cdot | s) - \pi^{(t)}(\cdot | s) \right\rangle \\ &= \sum_{t=1}^T \mu^{\pi}(s_{\text{root}}) \left\langle Q^{\pi^{(t)}}(s_{\text{root}}, \cdot), \pi(\cdot | s_{\text{root}}) - \pi^{(t)}(\cdot | s_{\text{root}}) \right\rangle \\ & \quad + \sum_{a=1}^B \pi(a | s_{\text{root}}) \sum_{t=1}^T \left( V^{\pi}(\mathcal{T}(s_{\text{root}}, a)) - V^{\pi^{(t)}}(\mathcal{T}(s_{\text{root}}, a)) \right) \\ &= \sum_{t=1}^T \sum_{a=1}^B \left( \pi(a | s_{\text{root}}) - \pi^{(t)}(a | s_{\text{root}}) \right) V^{\pi^{(t)}}(\mathcal{T}(s_{\text{root}}, a)) \\ & \quad + V^{\pi}(s_{\text{root}})T - \sum_{a=1}^B \pi(a | s_{\text{root}}) \sum_{t=1}^T V^{\pi^{(t)}}(\mathcal{T}(s_{\text{root}}, a)) \\ &= \sum_{t=1}^T \left( V^{\pi}(s_{\text{root}}) - V^{\pi^{(t)}}(s_{\text{root}}) \right). \end{aligned}$$

604 Therefore, Lemma E.4 also holds when  $H = H_0 + 1$  and thus we can conclude the proof.  $\square$

605 **Lemma E.6.** For any node  $s \in \mathcal{S} \setminus \mathcal{S}_H$  and  $t \in [T]$ , we have

$$\begin{aligned} & \eta \left\langle \tilde{A}^{(t-1)}(s, \cdot), \pi^*(\cdot | s) - \pi^{(t)}(\cdot | s) \right\rangle \\ & \leq \text{KL} \left( \pi^*(\cdot | s) \| \pi^{(t-1)}(\cdot | s) \right) - \text{KL} \left( \pi^*(\cdot | s) \| \pi^{(t)}(\cdot | s) \right) - \text{KL} \left( \pi^{(t)}(\cdot | s) \| \pi^{(t-1)}(\cdot | s) \right) \\ & \quad + \eta \beta \text{KL} \left( \pi^*(\cdot | s) \| \pi^{\theta^{\text{ref}}}(\cdot | s) \right). \end{aligned}$$

606 *Proof.* Let  $h$  be the height of  $s$ . There are three possibilities on  $\nabla_{\pi(\cdot | s)} \mathcal{J}^{(t-1)}$ : (I)  $\tilde{A}^{(t-1)}(s, \cdot) +$   
 607  $\beta \log \pi^{(t-1)}(\cdot | s) - \beta \log \pi^{\theta^{\text{ref}}}(\cdot | s) + \beta \mathbf{1}$ ; (II) A one-hot vector with only index  $a_h^*$  be  $\frac{\beta}{\pi^{(t-1)}(\cdot | s)}$ ;  
 608 (III)  $\mathbf{0}$ .

609 Then, we will show that (D.2) is equivalent to the following in different cases.

610 **Lemma E.7.** For any  $t \in \{1, 2, \dots, T\}$ ,  $h \in \{0, 1, \dots, H-1\}$ , and node  $s \in \mathcal{S}_h$ , (D.2) is  
 611 equivalent to the following,

$$\begin{aligned} \pi^{(t)}(\cdot | s) = \operatorname{argmin}_{\pi(\cdot | s) \in \Delta^B} & \left\langle -\tilde{A}^{(t-1)}(s, \cdot), \pi(\cdot | s) \right\rangle + \beta \text{KL} \left( \pi(\cdot | s) \| \pi^{\theta^{\text{ref}}}(\cdot | s) \right) \\ & + \frac{1}{\eta} \text{KL} \left( \pi(\cdot | s) \| \pi^{(t-1)}(\cdot | s) \right) \end{aligned} \quad (\text{I})$$

$$\pi^{(t)}(\cdot | s) = \operatorname{argmin}_{\pi(\cdot | s) \in \Delta^B} \left\langle -\nabla_{\pi(\cdot | s)} \mathcal{J}^{(t-1)}, \pi(\cdot | s) \right\rangle + \frac{1}{\eta} \text{KL} \left( \pi(\cdot | s) \| \pi^{(t-1)}(\cdot | s) \right), \quad (\text{II, III})$$

612 where (I), (II), (III) stand for the cases when

$$\nabla_{\pi(\cdot | s)} \mathcal{J}^{(t-1)} = \begin{cases} \tilde{A}^{(t-1)}(s, \cdot) + \beta \log \pi^{(t-1)}(\cdot | s) - \beta \log \pi^{\theta^{\text{ref}}}(\cdot | s) + \beta \mathbf{1} & (\text{I}) \\ \text{A one-hot vector with only index } a_h^* \text{ be } \frac{\beta}{\pi^{(t-1)}(\cdot | s)} & (\text{II}) \\ \mathbf{0}. & (\text{III}) \end{cases}$$

613 Then, we will introduce a special case of Lemma 3.0.3 from Liu [2025].

614 **Lemma E.8.** For any node  $s$ , vector  $\mathbf{g} \in \mathbb{R}^B$ ,  $\eta > 0$ ,  $\beta_0 \geq 0$ , policy  $\mathbf{x}^{(0)} \in \Delta^B$ , and reference  
 615 policy  $\mathbf{x}^{\text{ref}} \in \Delta^B$ , let

$$\mathbf{x}^{(1)} = \operatorname{argmin}_{\mathbf{x} \in \Delta^B} \left\{ \langle \mathbf{g}, \mathbf{x} \rangle + \beta_0 \text{KL}(\mathbf{x} \| \mathbf{x}^{\text{ref}}) + \frac{1}{\eta} \text{KL}(\mathbf{x} \| \mathbf{x}^{(0)}) \right\}.$$

616 Then, for any  $\mathbf{x}^{(2)} \in \Delta^B$ , we have

$$\begin{aligned} & \eta \beta_0 \text{KL}(\mathbf{x}^{(1)} \| \mathbf{x}^{\text{ref}}) - \eta \beta_0 \text{KL}(\mathbf{x}^{(2)} \| \mathbf{x}^{\text{ref}}) + \eta \langle \mathbf{g}, \mathbf{x}^{(1)} - \mathbf{x}^{(2)} \rangle \\ & \leq \text{KL}(\mathbf{x}^{(2)} \| \mathbf{x}^{(0)}) - (1 + \eta \beta_0) \text{KL}(\mathbf{x}^{(2)} \| \mathbf{x}^{(1)}) - \text{KL}(\mathbf{x}^{(1)} \| \mathbf{x}^{(0)}). \end{aligned} \quad (\text{E.7})$$

617 Consider (I) first. For any node  $s \in \mathcal{S} \setminus \mathcal{S}_H$  and  $t \in [T]$ , by taking  $\mathbf{x}^{(2)} = \pi^*(\cdot | s)$ ,  $\mathbf{x}^{(1)} =$   
 618  $\pi^{(t)}(\cdot | s)$ ,  $\mathbf{x}^{(0)} = \pi^{(t-1)}(\cdot | s)$ ,  $\mathbf{x}^{\text{ref}} = \pi^{\theta^{\text{ref}}}(\cdot | s)$ ,  $\mathbf{g} = -\tilde{A}^{(t-1)}(s, \cdot)$  and  $\beta_0 = \beta$ , we have

$$\begin{aligned} & \eta \beta \text{KL}(\pi^{(t)}(\cdot | s) \| \pi^{\theta^{\text{ref}}}(\cdot | s)) - \eta \beta \text{KL}(\pi^*(\cdot | s) \| \pi^{\theta^{\text{ref}}}(\cdot | s)) \\ & \quad + \eta \left\langle \tilde{A}^{(t-1)}(s, \cdot), \pi^*(\cdot | s) - \pi^{(t)}(\cdot | s) \right\rangle \\ & \leq \text{KL}(\pi^*(\cdot | s) \| \pi^{(t-1)}(\cdot | s)) - (1 + \eta \beta) \text{KL}(\pi^*(\cdot | s) \| \pi^{(t)}(\cdot | s)) - \text{KL}(\pi^{(t)}(\cdot | s) \| \pi^{(t-1)}(\cdot | s)). \end{aligned}$$

619 Further, by the non-negativity of KL-divergence, we have

$$\begin{aligned} & \eta \left\langle \tilde{A}^{(t-1)}(s, \cdot), \pi^*(\cdot | s) - \pi^{(t)}(\cdot | s) \right\rangle \\ & \leq \text{KL}(\pi^*(\cdot | s) \| \pi^{(t-1)}(\cdot | s)) - \text{KL}(\pi^*(\cdot | s) \| \pi^{(t)}(\cdot | s)) - \text{KL}(\pi^{(t)}(\cdot | s) \| \pi^{(t-1)}(\cdot | s)) \\ & \quad + \eta \beta \text{KL}(\pi^*(\cdot | s) \| \pi^{\theta^{\text{ref}}}(\cdot | s)). \end{aligned}$$

620 Consider (II). For any node  $s \in \mathcal{S} \setminus \mathcal{S}_H$  and  $t \in [T]$ , by taking  $\mathbf{x}^{(2)} = \pi^*(\cdot | s)$ ,  $\mathbf{x}^{(1)} =$   
621  $\pi^{(t)}(\cdot | s)$ ,  $\mathbf{x}^{(0)} = \pi^{(t-1)}(\cdot | s)$ ,  $\mathbf{x}^{\text{ref}} = \pi^{\boldsymbol{\theta}^{\text{ref}}}(\cdot | s)$ ,  $\mathbf{g} = -\nabla_{\pi(\cdot | s)} \mathcal{J}^{(t-1)}$  and  $\beta_0 = 0$  in Lemma E.8,  
622 we have

$$\eta \left\langle \nabla_{\pi(\cdot | s)} \mathcal{J}^{(t-1)}, \pi^*(\cdot | s) - \pi^{(t)}(\cdot | s) \right\rangle \\ \leq \text{KL} \left( \pi^*(\cdot | s) \| \pi^{(t-1)}(\cdot | s) \right) - \text{KL} \left( \pi^*(\cdot | s) \| \pi^{(t)}(\cdot | s) \right) - \text{KL} \left( \pi^{(t)}(\cdot | s) \| \pi^{(t-1)}(\cdot | s) \right).$$

623 Moreover,

$$\left\langle \nabla_{\pi(\cdot | s)} \mathcal{J}^{(t-1)}, \pi^*(\cdot | s) - \pi^{(t)}(\cdot | s) \right\rangle = \beta \frac{\pi^*(a_h^* | s_h^*) - \pi^{(t)}(a_h^* | s_h^*)}{\pi^{(t-1)}(a_h^* | s_h^*)} \\ \stackrel{(i)}{\geq} 0 \\ \stackrel{(ii)}{=} \left\langle \tilde{A}^{(t-1)}(s, \cdot), \pi^*(\cdot | s) - \pi^{(t)}(\cdot | s) \right\rangle.$$

624 (i) uses the fact that  $\pi^*(a_h^* | s_h^*) = 1$  and (ii) uses  $\tilde{A}^{(t-1)}(s, \cdot) = \mathbf{0}$  by definition. Therefore,

$$\left\langle \tilde{A}^{(t-1)}(s, \cdot), \pi^*(\cdot | s) - \pi^{(t)}(\cdot | s) \right\rangle \\ \leq \text{KL} \left( \pi^*(\cdot | s) \| \pi^{(t-1)}(\cdot | s) \right) - \text{KL} \left( \pi^*(\cdot | s) \| \pi^{(t)}(\cdot | s) \right) - \text{KL} \left( \pi^{(t)}(\cdot | s) \| \pi^{(t-1)}(\cdot | s) \right). \quad (\text{E.8})$$

625 For (III), which is  $s$  off the sampled trajectory at step  $t - 1$ , by definition we have  $\tilde{A}^{(t-1)}(s, \cdot) = \mathbf{0}$ .  
626 Then,

$$\left\langle \nabla_{\pi(\cdot | s)} \mathcal{J}^{(t-1)}, \pi^*(\cdot | s) - \pi^{(t)}(\cdot | s) \right\rangle = 0 = \left\langle \tilde{A}^{(t-1)}(s, \cdot), \pi^*(\cdot | s) - \pi^{(t)}(\cdot | s) \right\rangle,$$

627 and (E.8) also holds.  $\square$

628 **Lemma E.5.** For any  $h \in \{0, 1, \dots, H - 1\}$ , we have

$$\text{KL} \left( \pi^*(\cdot | s_h^*) \| \pi^{\boldsymbol{\theta}^{\text{ref}}}(\cdot | s_h^*) \right) \leq \log B + 2 \|\boldsymbol{\theta}^{\text{ref}}\|_{\infty}.$$

629 *Proof.* For any  $h \in \{0\} \cup [H - 1]$ , since  $\pi^*$  is deterministic, let  $a_h^*$  be the action such that  
630  $\pi^*(a_h^* | s_h^*) = 1$ . Then,

$$\text{KL} \left( \pi^*(\cdot | s_h^*) \| \pi^{\boldsymbol{\theta}^{\text{ref}}}(\cdot | s_h^*) \right) = \sum_{a=1}^B \pi^*(a | s_h^*) \log \frac{\pi^*(a | s_h^*)}{\pi^{\boldsymbol{\theta}^{\text{ref}}}(a | s_h^*)} = \log \frac{1}{\pi^{\boldsymbol{\theta}^{\text{ref}}}(a_h^* | s_h^*)}.$$

631 By definition, we have

$$\pi^{\boldsymbol{\theta}^{\text{ref}}}(a_h^* | s_h^*) = \frac{\exp(\boldsymbol{\theta}^{\text{ref}}(s_h^*, a_h^*))}{\sum_{a=1}^B \exp(\boldsymbol{\theta}^{\text{ref}}(s_h^*, a))} \geq \frac{\exp(-\|\boldsymbol{\theta}^{\text{ref}}\|_{\infty})}{B \exp(\|\boldsymbol{\theta}^{\text{ref}}\|_{\infty})} = \frac{\exp(-2\|\boldsymbol{\theta}^{\text{ref}}\|_{\infty})}{B}.$$

632 Therefore,

$$\text{KL} \left( \pi^*(\cdot | s_h^*) \| \pi^{\boldsymbol{\theta}^{\text{ref}}}(\cdot | s_h^*) \right) \leq \log(B \cdot \exp(2\|\boldsymbol{\theta}^{\text{ref}}\|_{\infty})) = \log B + 2\|\boldsymbol{\theta}^{\text{ref}}\|_{\infty}. \quad \square$$

633 **Lemma E.7.** For any  $t \in \{1, 2, \dots, T\}$ ,  $h \in \{0, 1, \dots, H - 1\}$ , and node  $s \in \mathcal{S}_h$ , (D.2) is  
634 equivalent to the following,

$$\pi^{(t)}(\cdot | s) = \underset{\pi(\cdot | s) \in \Delta^B}{\text{argmin}} \left\langle -\tilde{A}^{(t-1)}(s, \cdot), \pi(\cdot | s) \right\rangle + \beta \text{KL} \left( \pi(\cdot | s) \| \pi^{\boldsymbol{\theta}^{\text{ref}}}(\cdot | s) \right) \\ + \frac{1}{\eta} \text{KL} \left( \pi(\cdot | s) \| \pi^{(t-1)}(\cdot | s) \right) \quad (\text{I})$$

$$\pi^{(t)}(\cdot | s) = \underset{\pi(\cdot | s) \in \Delta^B}{\text{argmin}} \left\langle -\nabla_{\pi(\cdot | s)} \mathcal{J}^{(t-1)}, \pi(\cdot | s) \right\rangle + \frac{1}{\eta} \text{KL} \left( \pi(\cdot | s) \| \pi^{(t-1)}(\cdot | s) \right), \quad (\text{II, III})$$

635 where (I), (II), (III) stand for the cases when

$$\nabla_{\pi(\cdot | s)} \mathcal{J}^{(t-1)} = \begin{cases} \tilde{A}^{(t-1)}(s, \cdot) + \beta \log \pi^{(t-1)}(\cdot | s) - \beta \log \pi^{\boldsymbol{\theta}^{\text{ref}}}(\cdot | s) + \beta \mathbf{1} & (\text{I}) \\ \text{A one-hot vector with only index } a_h^* \text{ be } \frac{\beta}{\pi^{(t-1)}(\cdot | s)} & (\text{II}) \\ \mathbf{0}. & (\text{III}) \end{cases}$$

636 *Proof.* The Lagrangian of  $\langle -\tilde{A}^{(t-1)}(s, \cdot), \pi(\cdot | s) \rangle + \beta \text{KL}(\mathbf{x} \| \mathbf{x}^{\text{ref}}) + \frac{1}{\eta} \text{KL}(\pi(\cdot | s) \| \pi^{(t-1)}(\cdot | s))$   
 637 is

$$\begin{aligned} \mathcal{L}(\pi^{(t)}(\cdot | s)) &:= \langle -\tilde{A}^{(t-1)}(s, \cdot), \pi^{(t)}(\cdot | s) \rangle + \beta \text{KL}(\pi^{(t)}(\cdot | s) \| \pi^{\theta^{\text{ref}}}(\cdot | s)) \\ &\quad + \frac{1}{\eta} \text{KL}(\pi^{(t)}(\cdot | s) \| \pi^{(t-1)}(\cdot | s)) + \lambda \left( \sum_{a=1}^B \pi^{(t)}(a | s) - 1 \right). \end{aligned}$$

638 For any action  $a \in [B]$ , by setting  $\frac{\partial \mathcal{L}(\pi^{(t)}(\cdot | s))}{\partial \pi^{(t)}(a | s)} = 0$ , we have

$$-\tilde{A}^{(t-1)}(s, \cdot) + \beta \log \left( \frac{\pi^{(t)}(a | s)}{\pi^{\theta^{\text{ref}}}(a | s)} \right) + \beta + \frac{1}{\eta} \log \left( \frac{\pi^{(t)}(a | s)}{\pi^{(t-1)}(a | s)} \right) + \frac{1}{\eta} + \lambda = 0,$$

639 which implies that  $\pi^{(t)}(a | s) = \exp \left( \frac{-\eta\beta - 1 - \eta\lambda + \eta\tilde{A}^{(t-1)}(s, \cdot) + \eta\beta \log(\pi^{\theta^{\text{ref}}}(a | s)) + \log(\pi^{(t-1)}(a | s))}{1 + \eta\beta} \right).$

640 By further setting  $\frac{\partial \mathcal{L}(\pi^{(t)}(\cdot | s))}{\partial \lambda} = 0$ , we have

$$\sum_{a=1}^B \pi^{(t)}(a | s) = 1.$$

641 Therefore, by combining all pieces together, we have

$$\begin{aligned} \pi^{(t)}(a | s) &\stackrel{(i)}{=} \exp \left( \frac{\eta\tilde{A}^{(t-1)}(s, \cdot) + \eta\beta \log(\pi^{\theta^{\text{ref}}}(a | s)) + \log(\pi^{(t-1)}(a | s))}{1 + \eta\beta} \right) / Z \\ &\propto \exp \left( \frac{\eta\tilde{A}^{(t-1)}(s, \cdot) + \eta\beta \log(\pi^{\theta^{\text{ref}}}(a | s)) + \log(\pi^{(t-1)}(a | s))}{1 + \eta\beta} \right) \\ &\propto \exp \left( \frac{\eta}{1 + \eta\beta} \tilde{A}^{(t-1)}(s, \cdot) + \frac{\eta\beta}{1 + \eta\beta} \theta^{\text{ref}}(s, a) + \frac{1}{1 + \eta\beta} \theta^{(t-1)}(s, a) \right). \end{aligned}$$

642 In (i),  $Z = \sum_{a=1}^B \exp \left( \frac{\eta\tilde{A}^{(t-1)}(s, \cdot) + \eta\beta \log(\pi^{\theta^{\text{ref}}}(a | s)) + \log(\pi^{(t-1)}(a | s))}{1 + \eta\beta} \right).$

643 For (II), (III), the proof can be concluded by setting  $\beta = 0$  and changing  $\tilde{A}^{(t-1)}(s, \cdot)$  to  
 644  $\nabla_{\pi(\cdot | s)} \mathcal{J}^{(t-1)}$ .  $\square$

## NeurIPS Paper Checklist

### 1. Claims

Question: Do the main claims made in the abstract and introduction accurately reflect the paper's contributions and scope?

Answer: [\[Yes\]](#)

Justification: See Sections 4 and 5.

Guidelines:

- The answer NA means that the abstract and introduction do not include the claims made in the paper.
- The abstract and/or introduction should clearly state the claims made, including the contributions made in the paper and important assumptions and limitations. A No or NA answer to this question will not be perceived well by the reviewers.
- The claims made should match theoretical and experimental results, and reflect how much the results can be expected to generalize to other settings.
- It is fine to include aspirational goals as motivation as long as it is clear that these goals are not attained by the paper.

### 2. Limitations

Question: Does the paper discuss the limitations of the work performed by the authors?

Answer: [\[Yes\]](#)

Justification: See Section 6.

Guidelines:

- The answer NA means that the paper has no limitation while the answer No means that the paper has limitations, but those are not discussed in the paper.
- The authors are encouraged to create a separate "Limitations" section in their paper.
- The paper should point out any strong assumptions and how robust the results are to violations of these assumptions (e.g., independence assumptions, noiseless settings, model well-specification, asymptotic approximations only holding locally). The authors should reflect on how these assumptions might be violated in practice and what the implications would be.
- The authors should reflect on the scope of the claims made, e.g., if the approach was only tested on a few datasets or with a few runs. In general, empirical results often depend on implicit assumptions, which should be articulated.
- The authors should reflect on the factors that influence the performance of the approach. For example, a facial recognition algorithm may perform poorly when image resolution is low or images are taken in low lighting. Or a speech-to-text system might not be used reliably to provide closed captions for online lectures because it fails to handle technical jargon.
- The authors should discuss the computational efficiency of the proposed algorithms and how they scale with dataset size.
- If applicable, the authors should discuss possible limitations of their approach to address problems of privacy and fairness.
- While the authors might fear that complete honesty about limitations might be used by reviewers as grounds for rejection, a worse outcome might be that reviewers discover limitations that aren't acknowledged in the paper. The authors should use their best judgment and recognize that individual actions in favor of transparency play an important role in developing norms that preserve the integrity of the community. Reviewers will be specifically instructed to not penalize honesty concerning limitations.

### 3. Theory assumptions and proofs

Question: For each theoretical result, does the paper provide the full set of assumptions and a complete (and correct) proof?

Answer: [\[Yes\]](#)

Justification: See Section 4 and Appendix D.

Guidelines:

- The answer NA means that the paper does not include theoretical results.
- All the theorems, formulas, and proofs in the paper should be numbered and cross-referenced.
- All assumptions should be clearly stated or referenced in the statement of any theorems.
- The proofs can either appear in the main paper or the supplemental material, but if they appear in the supplemental material, the authors are encouraged to provide a short proof sketch to provide intuition.
- Inversely, any informal proof provided in the core of the paper should be complemented by formal proofs provided in appendix or supplemental material.
- Theorems and Lemmas that the proof relies upon should be properly referenced.

#### 4. Experimental result reproducibility

Question: Does the paper fully disclose all the information needed to reproduce the main experimental results of the paper to the extent that it affects the main claims and/or conclusions of the paper (regardless of whether the code and data are provided or not)?

Answer: [\[Yes\]](#)

Justification: See Appendix B.

Guidelines:

- The answer NA means that the paper does not include experiments.
- If the paper includes experiments, a No answer to this question will not be perceived well by the reviewers: Making the paper reproducible is important, regardless of whether the code and data are provided or not.
- If the contribution is a dataset and/or model, the authors should describe the steps taken to make their results reproducible or verifiable.
- Depending on the contribution, reproducibility can be accomplished in various ways. For example, if the contribution is a novel architecture, describing the architecture fully might suffice, or if the contribution is a specific model and empirical evaluation, it may be necessary to either make it possible for others to replicate the model with the same dataset, or provide access to the model. In general, releasing code and data is often one good way to accomplish this, but reproducibility can also be provided via detailed instructions for how to replicate the results, access to a hosted model (e.g., in the case of a large language model), releasing of a model checkpoint, or other means that are appropriate to the research performed.
- While NeurIPS does not require releasing code, the conference does require all submissions to provide some reasonable avenue for reproducibility, which may depend on the nature of the contribution. For example
  - (a) If the contribution is primarily a new algorithm, the paper should make it clear how to reproduce that algorithm.
  - (b) If the contribution is primarily a new model architecture, the paper should describe the architecture clearly and fully.
  - (c) If the contribution is a new model (e.g., a large language model), then there should either be a way to access this model for reproducing the results or a way to reproduce the model (e.g., with an open-source dataset or instructions for how to construct the dataset).
  - (d) We recognize that reproducibility may be tricky in some cases, in which case authors are welcome to describe the particular way they provide for reproducibility. In the case of closed-source models, it may be that access to the model is limited in some way (e.g., to registered users), but it should be possible for other researchers to have some path to reproducing or verifying the results.

#### 5. Open access to data and code

Question: Does the paper provide open access to the data and code, with sufficient instructions to faithfully reproduce the main experimental results, as described in supplemental material?



Answer: [Yes]

Justification: The code is in the supplementary materials.

Guidelines:

- The answer NA means that paper does not include experiments requiring code.
- Please see the NeurIPS code and data submission guidelines (<https://nips.cc/public/guides/CodeSubmissionPolicy>) for more details.
- While we encourage the release of code and data, we understand that this might not be possible, so “No” is an acceptable answer. Papers cannot be rejected simply for not including code, unless this is central to the contribution (e.g., for a new open-source benchmark).
- The instructions should contain the exact command and environment needed to run to reproduce the results. See the NeurIPS code and data submission guidelines (<https://nips.cc/public/guides/CodeSubmissionPolicy>) for more details.
- The authors should provide instructions on data access and preparation, including how to access the raw data, preprocessed data, intermediate data, and generated data, etc.
- The authors should provide scripts to reproduce all experimental results for the new proposed method and baselines. If only a subset of experiments are reproducible, they should state which ones are omitted from the script and why.
- At submission time, to preserve anonymity, the authors should release anonymized versions (if applicable).
- Providing as much information as possible in supplemental material (appended to the paper) is recommended, but including URLs to data and code is permitted.

## 6. Experimental setting/details

Question: Does the paper specify all the training and test details (e.g., data splits, hyperparameters, how they were chosen, type of optimizer, etc.) necessary to understand the results?

Answer: [Yes]

Justification: See Appendix B.

Guidelines:

- The answer NA means that the paper does not include experiments.
- The experimental setting should be presented in the core of the paper to a level of detail that is necessary to appreciate the results and make sense of them.
- The full details can be provided either with the code, in appendix, or as supplemental material.

## 7. Experiment statistical significance

Question: Does the paper report error bars suitably and correctly defined or other appropriate information about the statistical significance of the experiments?

Answer: [No]

Justification: To show the robustness of our algorithm, we run experiments on different models and training dataset. However, training LLMs is relatively costly, and we cannot afford to run all the experiments with multiple random seeds. This is also common in other papers in this area, such as DeepSeek-AI et al. [2025], Gandhi et al. [2025], Yu et al. [2025], Zeng et al. [2025].

Guidelines:

- The answer NA means that the paper does not include experiments.
- The authors should answer "Yes" if the results are accompanied by error bars, confidence intervals, or statistical significance tests, at least for the experiments that support the main claims of the paper.
- The factors of variability that the error bars are capturing should be clearly stated (for example, train/test split, initialization, random drawing of some parameter, or overall run with given experimental conditions).

- The method for calculating the error bars should be explained (closed form formula, call to a library function, bootstrap, etc.)
- The assumptions made should be given (e.g., Normally distributed errors).
- It should be clear whether the error bar is the standard deviation or the standard error of the mean.
- It is OK to report 1-sigma error bars, but one should state it. The authors should preferably report a 2-sigma error bar than state that they have a 96% CI, if the hypothesis of Normality of errors is not verified.
- For asymmetric distributions, the authors should be careful not to show in tables or figures symmetric error bars that would yield results that are out of range (e.g. negative error rates).
- If error bars are reported in tables or plots, The authors should explain in the text how they were calculated and reference the corresponding figures or tables in the text.

## 8. Experiments compute resources

Question: For each experiment, does the paper provide sufficient information on the computer resources (type of compute workers, memory, time of execution) needed to reproduce the experiments?

Answer: [Yes]

Justification: See Appendix B.

Guidelines:

- The answer NA means that the paper does not include experiments.
- The paper should indicate the type of compute workers CPU or GPU, internal cluster, or cloud provider, including relevant memory and storage.
- The paper should provide the amount of compute required for each of the individual experimental runs as well as estimate the total compute.
- The paper should disclose whether the full research project required more compute than the experiments reported in the paper (e.g., preliminary or failed experiments that didn't make it into the paper).

## 9. Code of ethics

Question: Does the research conducted in the paper conform, in every respect, with the NeurIPS Code of Ethics <https://neurips.cc/public/EthicsGuidelines>?

Answer: [Yes]

Justification: We conform to the NeurIPS Code of Ethics.

Guidelines:

- The answer NA means that the authors have not reviewed the NeurIPS Code of Ethics.
- If the authors answer No, they should explain the special circumstances that require a deviation from the Code of Ethics.
- The authors should make sure to preserve anonymity (e.g., if there is a special consideration due to laws or regulations in their jurisdiction).

## 10. Broader impacts

Question: Does the paper discuss both potential positive societal impacts and negative societal impacts of the work performed?

Answer: [NA]

Justification: Not applicable.

Guidelines:

- The answer NA means that there is no societal impact of the work performed.
- If the authors answer NA or No, they should explain why their work has no societal impact or why the paper does not address societal impact.
- Examples of negative societal impacts include potential malicious or unintended uses (e.g., disinformation, generating fake profiles, surveillance), fairness considerations (e.g., deployment of technologies that could make decisions that unfairly impact specific groups), privacy considerations, and security considerations.

- The conference expects that many papers will be foundational research and not tied to particular applications, let alone deployments. However, if there is a direct path to any negative applications, the authors should point it out. For example, it is legitimate to point out that an improvement in the quality of generative models could be used to generate deepfakes for disinformation. On the other hand, it is not needed to point out that a generic algorithm for optimizing neural networks could enable people to train models that generate Deepfakes faster.
- The authors should consider possible harms that could arise when the technology is being used as intended and functioning correctly, harms that could arise when the technology is being used as intended but gives incorrect results, and harms following from (intentional or unintentional) misuse of the technology.
- If there are negative societal impacts, the authors could also discuss possible mitigation strategies (e.g., gated release of models, providing defenses in addition to attacks, mechanisms for monitoring misuse, mechanisms to monitor how a system learns from feedback over time, improving the efficiency and accessibility of ML).

## 11. Safeguards

Question: Does the paper describe safeguards that have been put in place for responsible release of data or models that have a high risk for misuse (e.g., pretrained language models, image generators, or scraped datasets)?

Answer: [NA]

Justification: Not applicable.

Guidelines:

- The answer NA means that the paper poses no such risks.
- Released models that have a high risk for misuse or dual-use should be released with necessary safeguards to allow for controlled use of the model, for example by requiring that users adhere to usage guidelines or restrictions to access the model or implementing safety filters.
- Datasets that have been scraped from the Internet could pose safety risks. The authors should describe how they avoided releasing unsafe images.
- We recognize that providing effective safeguards is challenging, and many papers do not require this, but we encourage authors to take this into account and make a best faith effort.

## 12. Licenses for existing assets

Question: Are the creators or original owners of assets (e.g., code, data, models), used in the paper, properly credited and are the license and terms of use explicitly mentioned and properly respected?

Answer: [NA]

Justification: Not applicable.

Guidelines:

- The answer NA means that the paper does not use existing assets.
- The authors should cite the original paper that produced the code package or dataset.
- The authors should state which version of the asset is used and, if possible, include a URL.
- The name of the license (e.g., CC-BY 4.0) should be included for each asset.
- For scraped data from a particular source (e.g., website), the copyright and terms of service of that source should be provided.
- If assets are released, the license, copyright information, and terms of use in the package should be provided. For popular datasets, [paperswithcode.com/datasets](https://paperswithcode.com/datasets) has curated licenses for some datasets. Their licensing guide can help determine the license of a dataset.
- For existing datasets that are re-packaged, both the original license and the license of the derived asset (if it has changed) should be provided.

- If this information is not available online, the authors are encouraged to reach out to the asset’s creators.

### 13. New assets

Question: Are new assets introduced in the paper well documented and is the documentation provided alongside the assets?

Answer: [NA]

Justification: Not applicable.

Guidelines:

- The answer NA means that the paper does not release new assets.
- Researchers should communicate the details of the dataset/code/model as part of their submissions via structured templates. This includes details about training, license, limitations, etc.
- The paper should discuss whether and how consent was obtained from people whose asset is used.
- At submission time, remember to anonymize your assets (if applicable). You can either create an anonymized URL or include an anonymized zip file.

### 14. Crowdsourcing and research with human subjects

Question: For crowdsourcing experiments and research with human subjects, does the paper include the full text of instructions given to participants and screenshots, if applicable, as well as details about compensation (if any)?

Answer: [NA]

Justification: Not applicable.

Guidelines:

- The answer NA means that the paper does not involve crowdsourcing nor research with human subjects.
- Including this information in the supplemental material is fine, but if the main contribution of the paper involves human subjects, then as much detail as possible should be included in the main paper.
- According to the NeurIPS Code of Ethics, workers involved in data collection, curation, or other labor should be paid at least the minimum wage in the country of the data collector.

### 15. Institutional review board (IRB) approvals or equivalent for research with human subjects

Question: Does the paper describe potential risks incurred by study participants, whether such risks were disclosed to the subjects, and whether Institutional Review Board (IRB) approvals (or an equivalent approval/review based on the requirements of your country or institution) were obtained?

Answer: [NA]

Justification: Not applicable.

Guidelines:

- The answer NA means that the paper does not involve crowdsourcing nor research with human subjects.
- Depending on the country in which research is conducted, IRB approval (or equivalent) may be required for any human subjects research. If you obtained IRB approval, you should clearly state this in the paper.
- We recognize that the procedures for this may vary significantly between institutions and locations, and we expect authors to adhere to the NeurIPS Code of Ethics and the guidelines for their institution.
- For initial submissions, do not include any information that would break anonymity (if applicable), such as the institution conducting the review.

### 16. Declaration of LLM usage

956 Question: Does the paper describe the usage of LLMs if it is an important, original, or  
957 non-standard component of the core methods in this research? Note that if the LLM is used  
958 only for writing, editing, or formatting purposes and does not impact the core methodology,  
959 scientific rigorousness, or originality of the research, declaration is not required.

960 Answer: [NA]

961 Justification: Not applicable.

962 Guidelines:

- 963 • The answer NA means that the core method development in this research does not  
964 involve LLMs as any important, original, or non-standard components.
- 965 • Please refer to our LLM policy (<https://neurips.cc/Conferences/2025/LLM>) for  
966 what should or should not be described.
